# Supplementary material for: Salt reduction in England from 2003 to 2011: its relationship to blood pressure, stroke and ischaemic heart disease mortality
Source: PubMed Central journal article supplement — BMJ Open. 2014 Apr 1;4(4):e004549. doi: 10.1136/bmjopen-2013-004549 (PMC3987732; doi:10.1136/bmjopen-2013-004549), 2014-04-01
Supplement: bmjopen-2013-004549.draft_revisions.pdf [file bmjopen-2013-004549.draft_revisions.pdf]

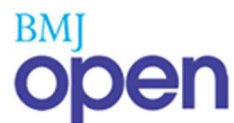

**Blood pressure and cardiovascular mortality in England  
from 2003 to 2011 – The impact of salt reduction**

|                                 |                                                                                                                                                                                                                                                                                          |
|---------------------------------|------------------------------------------------------------------------------------------------------------------------------------------------------------------------------------------------------------------------------------------------------------------------------------------|
| Journal:                        | <i>BMJ Open</i>                                                                                                                                                                                                                                                                          |
| Manuscript ID:                  | bmjopen-2013-004549                                                                                                                                                                                                                                                                      |
| Article Type:                   | Research                                                                                                                                                                                                                                                                                 |
| Date Submitted by the Author:   | 25-Nov-2013                                                                                                                                                                                                                                                                              |
| Complete List of Authors:       | He, Feng; Queen Mary University of London, Wolfson Institute of Preventive Medicine<br>Pombo-Rodrigues, Sonia; Queen Mary University of London, Wolfson Institute of Preventive Medicine<br>MacGregor, Graham; Queen Mary University of London, Wolfson Institute of Preventive Medicine |
| <b>Primary Subject Heading</b>: | Public health                                                                                                                                                                                                                                                                            |
| Secondary Subject Heading:      | Epidemiology                                                                                                                                                                                                                                                                             |
| Keywords:                       | dietary salt, blood pressure , cardiovascular mortality , England                                                                                                                                                                                                                        |
|                                 |                                                                                                                                                                                                                                                                                          |

SCHOLARONE™  
Manuscripts

1  
2  
3 **Blood pressure and cardiovascular mortality in England from 2003 to 2011**  
4  
5 **– The impact of salt reduction**  
6  
7

8  
9 Feng J He, Sonia Pombo-Rodrigues, Graham A MacGregor  
10

11  
12  
13 Wolfson Institute of Preventive Medicine, Barts and The London School of Medicine & Dentistry,  
14  
15 Queen Mary University of London, UK  
16  
17

18  
19  
20  
21  
22  
23  
24  
25  
26 **Running title:** Impact of salt reduction on BP and CVD mortality  
27  
28  
29  
30  
31  
32  
33  
34  
35  
36  
37

38 Correspondence to:

39 Dr. Feng He

40  
41 Wolfson Institute of Preventive Medicine,

42 Barts and The London School of Medicine & Dentistry,

43  
44 Queen Mary University of London,

45 Charterhouse Square,

46  
47 London EC1M 6BQ.

48  
49 Tel: 44 (0)20 7882 6266

50  
51 Fax: 44 (0)20 7882 6270

52  
53 E-mail: f.he@qmul.ac.uk  
54  
55  
56  
57  
58  
59  
60

## Abstract

**Objectives:** To study the trend of stroke and ischemic heart disease(IHD) mortality and blood pressure(BP) between 2003 and 2011 in England, and to determine the extent to which the reduction in salt intake occurred during this period contributed to those changes.

**Design:** Non-institutionalised population surveys.

**Setting and participants:** England, 2003 n=14,836, 2006 n=14,142, 2008 n=15,098 and 2011 n=8,610, aged  $\geq 16$  years.

**Outcomes:** Stroke and IHD mortality, BP and 24-hour urinary sodium.

**Results:** From 2003 to 2011, there was a decrease in mortality from stroke by 42% and IHD by 40%. In parallel, there was a fall in BP of 3.0/1.4mmHg ( $P<0.001$ /  $P<0.001$ ), a decrease of 0.3mmol/L ( $P<0.001$ ) in cholesterol, a reduction in smoking from 25% to 20%( $P<0.001$ ), an increase in fruit and vegetable consumption (0.2 portion/d,  $P<0.001$ ), and an increase in body mass index(BMI) ( $0.4\text{kg/m}^2$ ,  $P<0.001$ ). Salt intake as measured by 24-hour urinary sodium decreased by 1.4 g/d ( $P<0.01$ ). It is likely that all of these factors, along with improvements in the treatments of BP, cholesterol and CVD contributed to the falls in stroke and IHD mortality. In individuals who were not on BP treatment, there was a fall in BP of  $2.7\pm 0.3/1.1\pm 0.2\text{mmHg}$  ( $P<0.001$ /  $P<0.001$ ) after adjusting for age, sex, ethnic group, education, household income, alcohol consumption, fruit and vegetable intake, and BMI. Although salt intake was not measured in these participants, the fact that the average salt intake in a random sample of the UK population fell by 15% during the same period, suggests that these falls in BP would be largely attributable to the reduction in salt intake.

**Conclusions:** The reduction in salt intake is likely to be a major contributor to the fall in BP from 2003 to 2011 in England. As a result, it would also have contributed to the decreases in stroke and IHD mortality.

## ARTICLE SUMMARY

### Article focus

- A modest reduction in salt intake lowers blood pressure (BP) and, thereby, reduces cardiovascular risk.
- In the UK, salt intake as measured by 24-hour urinary sodium excretion decreased from 9.5 to 8.1 g/d from 2003 to 2011. During the same period, there was also a fall in BP and a decrease in stroke and ischemic heart disease (IHD) mortality.

### Key messages

- Our analysis of the data from the Health Survey for England showed that, in individuals who were not on any BP treatment or other treatments which might affect BP, there was a significant fall in BP of 2.7/1.1 mmHg from 2003 to 2011 after taking into account almost all factors known to be associated with BP including age, sex, ethnic group, education level, household income, alcohol consumption, fruit and vegetable intake and body mass index. Salt intake, a major determinant of population BP, was not included in this analysis because it was not measured in these participants. However, the fact that salt intake fell by 15% during the same period, would strongly suggest that these falls in BP were largely attributable to the reduction in salt intake.
- As BP throughout its range is a major cause of stroke and IHD, the reduction in salt intake through its effect on BP, would also have played an important role in the reduction in stroke and IHD mortality that occurred in England during this period.

### Strengths and limitations of this study

- The study used the best available data in England.
- Various surveys included different sets of participants. Therefore, the results of our study are potentially subject to ecological bias.

## Introduction

Cardiovascular disease (CVD) is the leading cause of death and disability worldwide. Unhealthy diet and lifestyle factors are responsible for 80% of CVD.<sup>1</sup> Among all of the risk factors for CVD, raised blood pressure (BP) is a major one, accounting for 62% of stroke and 49% of ischemic heart disease (IHD).<sup>2</sup> The recent analysis of global disease burden shows that raised BP is the leading risk factor accounting for 7% global disability adjusted life-years in 2010 and contributing to 9.4 million deaths per year worldwide.<sup>3</sup>

The Health Survey for England has reported a fall in BP in the adult population between 2003 and 2011.<sup>4</sup> CVD mortality has also reportedly decreased in England.<sup>5</sup> These reductions in BP and CVD mortality could be attributable to various factors such as changes in diet and lifestyle, as well as improvements in the treatments of BP, cholesterol and CVD.<sup>5</sup>

The UK initiated a nationwide salt reduction programme in 2003/2004.<sup>6</sup> The programme has been successful and resulted in a 15% reduction in salt intake of the whole population by 2011.<sup>7</sup> To determine the extent to which the reduction in salt intake contributed to the decreases of BP and CVD mortality, we analysed the data from a series of health surveys carried out in England.

## Methods

### Data sources

#### Health Survey for England

We used the BP and other CVD risk factor data from the Health Survey for England,<sup>4 8-11</sup> which is an annual survey of a random sample of the English population living in private households. Data were obtained from the UK Data Service.<sup>12</sup> The methods used in the Health Survey for England were reported in detail elsewhere<sup>4</sup> and only methods relevant to the current analysis are described in brief here.

1  
2  
3 We used the Health Survey for England data 2003,<sup>8</sup> 2006,<sup>9</sup> 2008<sup>10</sup> and 2011<sup>11</sup>. In all surveys,  
4  
5 the interviewers recorded demographic information, smoking status and consumption of  
6  
7 alcohol, fruit and vegetables. Trained nurses measured body weight, height and BP. Since  
8  
9 2003, BP has been measured using Omron HEM207 using a standardised protocol in all  
10  
11 surveys. In our analysis, we included participants aged  $\geq 16$  years.  
12  
13

### 14 15 **National Diet and Nutrition Survey** 16

17  
18 The mean 24-hour urinary sodium was taken from the National Diet and Nutrition Survey.<sup>7</sup>  
19  
20 In the 2000/2001 survey, 24-hour urine was collected in a random sample of adults in Great  
21  
22 Britain. In the 2005/2006 survey, 24-hour urine was collected in a random sample of adults in  
23  
24 England which was part of the Health Survey for England. In 2008, the 24-hour urine  
25  
26 collection was made in a random sample of adults in the UK and, in 2011, 24-hour urine was  
27  
28 collected in a random sample of adults in England. In all surveys, the completeness of the 24-  
29  
30 hour urine collection was assessed using the para-aminobenzoic acid (PABA) recovery  
31  
32 method.<sup>7 13</sup>  
33  
34  
35  
36

### 37 38 **Office for National Statistics** 39

40  
41 From the Office for National Statistics, we obtained the number of deaths from IHD (I20-  
42  
43 I25), cerebrovascular diseases (I60-I69) and mid-year population estimates aged  $\geq 15$  years  
44  
45 for England and Wales.<sup>14</sup>  
46  
47

### 48 49 **Statistical analysis** 50

51  
52 IHD and stroke mortality was calculated as the number of IHD or stroke deaths divided by  
53  
54 the population. Descriptive data on salt intake, BP and other continuous variables were  
55  
56  
57  
58  
59  
60

1  
2  
3 reported as mean±SE. Comparisons among the four years (2003, 2006, 2008 and 2011) were  
4  
5 made by One-Way ANOVA for continuous variables and by  $\chi^2$  test for categorical variables.  
6  
7

8  
9 To estimate the contribution of salt intake to the changes of BP and to exclude any potential  
10  
11 confounding effect of treatments, we performed a separate analysis that included only  
12  
13 individuals who were not on any BP treatment or other treatments that might affect BP. We  
14  
15 compared BP in 2011 with that in 2003 using multiple regression analysis, with adjustment  
16  
17 for potential confounding factors. In the regression model, systolic or diastolic BP was  
18  
19 entered as the dependent variable and the independent variables included year (1=2011 and  
20  
21 0=2003), age, sex (1=male and 0=female), ethnic group (1=white and 0=other), education  
22  
23 level (1=A level or above and 0=other), household income (1=top 3 quintiles and 0=bottom 2  
24  
25 quintiles), alcohol consumption (1=once or more a month and 0=less than once a month),  
26  
27 fruit and vegetable intake, and body mass index (BMI).  
28  
29

30  
31  
32 As 24-hour urinary sodium was not measured in the participants involved in the Health  
33  
34 Survey for England, where BP and other CVD risk factors were recorded, we assumed that  
35  
36 the changes in BP from 2003 to 2011, after adjusting for the above variables which included  
37  
38 almost all other factors known to be related to BP, were largely attributable to the changes in  
39  
40 population salt intake which occurred during the same period.  
41  
42

43  
44 All statistical analyses were carried out using Statistical Package for Social Science (SPSS).  
45  
46

## 47 48 **Results**

### 49 50 **Stroke and IHD mortality**

51  
52 In 2003, the mortality rates from stroke were 134/100,000 and the mortality rates from IHD  
53  
54 were 232/100,000 for the adult population in England. As shown in Figure 1, there had been  
55  
56 a gradual reduction in both stroke and IHD mortality. By 2011, stroke mortality decreased to  
57  
58  
59  
60

1  
2  
3 78/100,000 and IHD mortality decreased to 139/100,000. Therefore, from 2003 to 2011, there  
4  
5 was a reduction in mortality by 42% and 40% for stroke and IHD respectively.  
6  
7

### 8 **BP and other CVD risk factors**

9

10 Table 1 showed the comparisons among the four years (2003, 2006, 2008 and 2011) in  
11 demographics and CVD risk factors. The mean age was slightly but significantly higher in  
12 2011 compared with that in 2003. Despite this, the mean BP fell from  $129\pm 0.2/74\pm 0.1$  mmHg  
13 in 2003 to  $126\pm 0.3/73\pm 0.2$  mmHg in 2011 (i.e. a fall of 3.0/1.4 mmHg,  $P<0.001$  for both  
14 systolic and diastolic BP). From 2003 to 2011, there was a decrease of 0.3 mmol/L ( $P<0.001$ )  
15 in total cholesterol, a reduction in smoking prevalence from 25% to 20% ( $P<0.001$ ), and an  
16 increase in fruit and vegetable consumption of 0.2 portion/d ( $P<0.001$ ). At the same time,  
17 there was a small but significant increase in body mass index (BMI) by  $0.4\text{ kg/m}^2$  ( $P<0.001$ )  
18 and a small decrease in HDL (by 0.02 mmol/L,  $P<0.001$ ).  
19  
20  
21  
22  
23  
24  
25  
26  
27  
28  
29  
30

31 The average salt intake, as measured by 24-hour urinary sodium excretion in a random  
32 sample of the adult population, was  $9.5\pm 0.2$  g/d in 2000/2001. Salt intake fell to  $9.0\pm 0.4$  g/d  
33 in 2005/2006,  $8.64\pm 0.2$  g/d in 2008, and fell further to  $8.1\pm 0.2$  g/d by 2011.<sup>7</sup> Therefore, from  
34 2003 to 2011, salt intake decreased by 1.4 g/d (i.e. 15%,  $P<0.05$  for the downward trend).<sup>7</sup>  
35  
36  
37  
38  
39  
40

41 It is likely that all of the above factors, i.e. the fall in BP, total cholesterol and smoking, the  
42 reduction in salt intake and the increase in the consumption of fruit and vegetables, along  
43 with improvements in the treatments of BP, cholesterol and CVD, contributed to the  
44 decreases in stroke and IHD mortality.  
45  
46  
47  
48  
49

### 50 **BP in untreated individuals**

51

52 To investigate the role of salt reduction in the changes of BP, we compared the BP in 2011  
53 with that in 2003 with adjustment for potential confounding factors. In order to further  
54  
55  
56  
57  
58  
59  
60



1  
2  
3 exclude any potential confounding effect of BP treatments, we included only individuals who  
4  
5 were not on any BP treatment or other treatments that might affect BP.  
6  
7

8 The results showed that there was a fall in BP of  $2.7 \pm 0.3/1.1 \pm 0.2$  mmHg ( $P < 0.001$  for both  
9  
10 systolic and diastolic BP) from 2003 to 2011 after adjusting for age, sex, ethnic group,  
11  
12 education level, household income, alcohol consumption, fruit and vegetable intake and BMI.  
13  
14 These variables altogether explained 28% of the variance of systolic BP and 16% of the  
15  
16 variance of diastolic BP.  
17  
18

19 Salt intake was not included in the above regression model because it was not measured in  
20  
21 the same participants. However, the fact that after adjusting for almost all other variables  
22  
23 known to be associated with BP, there was still a significant fall in BP of  $2.7/1.1$  mmHg from  
24  
25 2003 to 2011, would suggest that these falls in BP were likely to be attributable to the  
26  
27 reduction in population salt intake that occurred during this period.  
28  
29  
30

### 31 **Discussion**

32  
33 Our analyses showed that the average BP in the adult population in England decreased by  
34  
35  $3.0/1.4$  mmHg from 2003 to 2011. This could be attributable to various factors such as the  
36  
37 reduction in salt intake, the increase in fruit and vegetable consumption, and the improvement  
38  
39 in BP treatment and control. However, our findings that, in untreated individuals, there was a  
40  
41 fall in BP of  $2.7/1.1$  mmHg after taking into account age, sex, ethnic group, education level,  
42  
43 household income, alcohol consumption, fruit and vegetable intake and BMI, strongly  
44  
45 suggest that the reduction in salt intake that occurred from 2003 to 2011 would be the major  
46  
47 contributor to the fall in BP. These results are supported by the compelling evidence from  
48  
49 various types of studies which have consistently demonstrated that dietary salt is a major  
50  
51 determinant of population BP.<sup>15 16</sup>  
52  
53  
54  
55  
56  
57  
58  
59  
60

1  
2  
3 The question is whether our results would be confounded by the pay for performance  
4 programme which was introduced by the UK government in 2004.<sup>17</sup> This programme, known  
5 as the Quality and Outcomes Framework, intended to improve hypertension control by  
6 making bonus payments to general practitioners for achieving benchmarks for hypertension  
7 care, although the efficacy of this programme has been questioned.<sup>18</sup> In spite of this, there  
8 had been no change to the antihypertensive drug treatment threshold from 2003 to 2011.<sup>19-21</sup>  
9 Therefore, this programme is unlikely to have a big confounding effect on our results in  
10 individuals who were not on BP treatment.  
11  
12  
13  
14  
15  
16  
17  
18  
19

20  
21 Although our analysis focused on individuals who were not on BP treatment, there is clear  
22 evidence that, in individuals who are on antihypertensive drug treatments, a reduction in salt  
23 intake is additive to drug therapies,<sup>22 23</sup> particularly drugs that block the renin-angiotensin  
24 system.<sup>22</sup> Therefore, salt reduction would also have contributed to the falls in BP in those  
25 who were on BP treatments.  
26  
27  
28  
29  
30  
31

32  
33 It is well established that raised BP throughout its range is a major cause of CVD.<sup>24</sup> A  
34 reduction in salt intake through its effect on BP would reduce CVD.<sup>25 26</sup> Additionally,  
35 increasing evidence suggests that salt reduction may have a direct beneficial effect on  
36 reducing CVD.<sup>15</sup> It is therefore, of interest, that we found a decrease in both stroke and IHD  
37 mortality in parallel with the reduction in salt intake and the falls in BP from 2003 to 2011 in  
38 England. Various other studies have documented a reduction in the incidence of CVD. For  
39 example, a study using the South London Stroke Register showed that the incidence of stroke  
40 decreased from 247/100,000 in 1995 to 149.5/100,000 in 2010 (i.e. a reduction of 39.5% over  
41 16 years),<sup>27</sup> and an analysis of the General Practice Research Database showed that the  
42 incidence of stroke in the UK fell by 29% between 1999 and 2008.<sup>28</sup>  
43  
44  
45  
46  
47  
48  
49  
50  
51  
52  
53

54  
55 It is difficult to quantify the relative contribution of salt reduction to the decrease of CVD as  
56 several other dietary and lifestyle factors as well as treatments all have played a part.  
57  
58  
59  
60

1  
2  
3 However, based on the meta-analysis of BP treatment trials where a 10 mmHg reduction in  
4 systolic BP was related to a decrease of 41% in stroke and 22% in IHD,<sup>29</sup> it was estimated  
5 that a 2.7 mmHg reduction in systolic BP that occurred with salt reduction would be  
6 predicted to reduce stroke by 11% and IHD by 6%. Therefore, salt reduction is likely to have  
7 played an important role in the decreases of stroke and IHD mortality in England. These  
8 results are supported by the evidence from both prospective cohort studies and outcome trials  
9 which have demonstrated that a reduction in salt intake is related to a decrease in CVD risk.<sup>26</sup>  
10  
11  
12  
13  
14  
15  
16  
17  
18  
19  
20  
21  
22  
23  
24  
25  
26  
27  
28  
29  
30  
31  
32  
33  
34  
35  
36  
37  
38  
39  
40  
41  
42  
43  
44  
45  
46  
47  
48  
49  
50  
51  
52  
53  
54

Our findings that a reduction in population salt intake led to a fall in population BP and CVD  
mortality in England are consistent with those observed in Japan and Finland.<sup>32 33</sup> Japan, in  
the late 1960s, carried out a government-led campaign to reduce salt intake. Over the  
following decade, salt intake was reduced, particularly in northern areas from 18 to 14 g/d.  
Paralleling this reduction in salt intake, there were falls in BP and an 80% reduction in stroke  
mortality<sup>32</sup> in spite of large increases in fat intake, cigarette smoking, alcohol consumption  
and obesity which occurred during that period. Finland, in the late 1970s, initiated a  
systematic approach to reducing salt intake through mass media-campaigns, co-operation  
with the food industry and implementing salt labelling legislation.<sup>33-35</sup> This led to a  
significant reduction in the average salt intake of the Finnish population<sup>33 35</sup> from  $\approx 14$  g/d in  
1972 to less than 9 g/d in 2002.<sup>33</sup> The reduction in salt intake was accompanied by a fall of  
over 10 mmHg in both systolic and diastolic BP and a decrease of 75-80% in both stroke and  
IHD mortality. Although these results were attributable to several factors, the reduction in  
salt intake is likely to have played a major role, particularly in the fall in BP as BMI and  
alcohol consumption increased during that time.

**Strengths and limitations:** The strength of our analysis is that we used the data from a  
nationally representative sample of the population in England. However, there are several

1  
2  
3 potential limitations. First, our study used an ecological design that is subject to various  
4  
5 methodological issues.<sup>36</sup> Because we used data from national surveys that included different  
6  
7 sets of participants both cross-sectionally and longitudinally, we were unable to work with  
8  
9 data at the individual level. Therefore, the results of our study are potentially subject to  
10  
11 ecological bias. Second, the trend in 24-hour urinary sodium reported in our paper was taken  
12  
13 from the data either for England, Great Britain or the UK, as the original report did not  
14  
15 separate the results by countries. Such a difference in the composition of the population  
16  
17 surveyed may cause a bias to the trend in 24-hour urinary sodium. However, the small  
18  
19 proportion of the population in Scotland, Wales and Northern Ireland (altogether accounting  
20  
21 for 16% of the total UK population) would indicate that the bias, if any, would be small.  
22  
23  
24

## 25 26 **Conclusions**

27  
28 The reduction in salt intake is likely to be a major contributor to the fall in BP in England  
29  
30 from 2003 to 2011. As a result, the decrease in salt intake would also have played an  
31  
32 important role in the reduction in stroke and IHD mortality.  
33  
34  
35  
36

37  
38 **Acknowledgement:** We thank the original data creators, depositors, copyright holders, the  
39  
40 funders of the Data Collections, and the UK Data Service for the use of data from the Health  
41  
42 Survey for England. They bear no responsibility for the current analysis or interpretation of  
43  
44 the results.  
45  
46

47  
48 **Contributors:** FJH and GAM designed the analysis plan. FJH performed statistical analyses  
49  
50 and wrote the first draft of the manuscript. SPR contributed to database organisation and  
51  
52 variable selections. All authors contributed to the interpretation of the results and revision of  
53  
54 the manuscript. FJH is guarantor.  
55

56  
57 **Funding:** The study did not receive any funding.  
58  
59  
60

1  
2  
3 **Competing interests:** All authors have completed the ICMJE uniform disclosure form at  
4 [www.icmje.org/coi\\_disclosure.pdf](http://www.icmje.org/coi_disclosure.pdf) (available on request from the corresponding author) and  
5  
6 declare: no support from any organisation for the submitted work; no financial relationships  
7  
8 with any organisations that might have an interest in the submitted work in the previous three  
9  
10 years. FJH is a member of Consensus Action on Salt & Health (CASH) and World Action on  
11  
12 Salt & Health (WASH). Both CASH and WASH are non-profit charitable organisations and  
13  
14 FJH does not receive any financial support from CASH or WASH. GAM is Chairman of  
15  
16 Blood Pressure UK (BPUK), Chairman of CASH and Chairman of WASH. BPUK, CASH  
17  
18 and WASH are non-profit charitable organisations. GAM does not receive any financial  
19  
20 support from any of these organisations. SPR is an employee of CASH.  
21  
22  
23  
24  
25  
26  
27

28 **Ethics committee approval:** Our study is an analysis of previously collected data and  
29  
30 therefore ethical approval was not required for our analysis. Ethical approval for the Health  
31  
32 Survey for England was obtained by the survey team.  
33  
34  
35  
36  
37

38 **Data sharing statement:** No additional data are available. The data are already in the public  
39  
40 domain.  
41  
42  
43  
44  
45  
46  
47  
48  
49  
50  
51  
52  
53  
54  
55  
56  
57  
58  
59  
60

1  
2  
3  
4  
5  
6  
7  
8  
9  
10  
11  
12  
13  
14  
15  
16  
17  
18  
19  
20  
21  
22  
23  
24  
25  
26  
27  
28  
29  
30  
31  
32  
33  
34  
35  
36  
37  
38  
39  
40  
41  
42  
43  
44  
45  
46  
47  
48  
49  
50  
51  
52  
53  
54  
55  
56  
57  
58  
59  
60

**Legend to Figure**

**Figure 1.** Changes in salt intake as measured by 24-hour urinary sodium excretion, blood pressure, stroke and ischemic heart disease (IHD) mortality in England from 2003 to 2011.

For peer review only

## References

1. World Health Organization. Global status report on noncommunicable diseases. 2010. [http://whqlibdoc.who.int/publications/2011/9789240686458\\_eng.pdf](http://whqlibdoc.who.int/publications/2011/9789240686458_eng.pdf) (Accessed on 29 October 2013).
2. World Health Report 2002: Reducing risks, promoting healthy life. Geneva, Switzerland: World Health Organisation, 2002. [www.who.int/whr/2002](http://www.who.int/whr/2002) (Accessed 3 June 2013).
3. Lim SS, Vos T, Flaxman AD, Danaei G, Shibuya K, Adair-Rohani H, et al. A comparative risk assessment of burden of disease and injury attributable to 67 risk factors and risk factor clusters in 21 regions, 1990-2010: a systematic analysis for the Global Burden of Disease Study 2010. *Lancet* 2012;380:2224-60.
4. Health Survey for England. <http://www.natcen.ac.uk/study/health-survey-for-england-2011> (Accessed on 15 August 2013).
5. O'Flaherty M, Buchan I, Capewell S. Contributions of treatment and lifestyle to declining CVD mortality: why have CVD mortality rates declined so much since the 1960s? *Heart* 2013;99:159-62.
6. He FJ, Brinsden HC, MacGregor GA. Salt reduction in the United Kingdom: a successful experiment in public health. *J Hum Hypertens* 2003:Advance online publication, 31 October 2013; doi:10.1038/jhh.2013.105.
7. Department of Health: Assessment of Dietary Sodium Levels Among Adults (aged 19-64) in England, 2011. <http://transparency.dh.gov.uk/2012/06/21/sodium-levels-among-adults/> (Accessed 25 June 2012).
8. National Centre for Social Research and University College London. Department of Epidemiology and Public Health, Health Survey for England, 2003 [computer file]. 2nd Edition. Colchester, Essex: UK Data Archive [distributor], April 2010. SN: 5098 , <http://dx.doi.org/10.5255/UKDA-SN-5098-1> (Accessed on 5 November 2013).
9. National Centre for Social Research and University College London. Department of Epidemiology and Public Health, Health Survey for England, 2006 [computer file]. 4th Edition. Colchester, Essex: UK Data Archive [distributor], July 2011. SN: 5809 , <http://dx.doi.org/10.5255/UKDA-SN-5809-1> (Accessed on 5 November 2013).
10. National Centre for Social Research and University College London. Department of Epidemiology and Public Health, Health Survey for England, 2008 [computer file]. 4th Edition. Colchester, Essex: UK Data Archive [distributor], August 2013. SN: 6397 , <http://dx.doi.org/10.5255/UKDA-SN-6397-2> (Accessed on 5 November 2013).
11. NatCen Social Research and University College London. Department of Epidemiology and Public Health, Health Survey for England, 2011 [computer file]. Colchester, Essex: UK Data Archive [distributor], April 2013. SN: 7260 , <http://dx.doi.org/10.5255/UKDA-SN-7260-1> (Accessed on 5 November 2013).
12. UK DATA SERVICE. <http://ukdataservice.ac.uk/> (Accessed on 15 August 2013).
13. Bingham S, Cummings JH. The use of 4-aminobenzoic acid as a marker to validate the completeness of 24 h urine collections in man. *Clin Sci (Lond)* 1983;64:629-35.
14. National Statistics. Deaths Registered in England and Wales in 2010 by Cause. Office for National Statistics, 2011. <http://www.ons.gov.uk/ons/rel/vsob1/mortality-statistics-->



- 1  
2  
3 [deaths-registered-in-england-and-wales--series-dr-/2010/stb-deaths-by-cause-2010.html](http://www.nhs.uk/statistics/deaths-registered-in-england-and-wales--series-dr-/2010/stb-deaths-by-cause-2010.html)  
4 (Accessed 14 August 2013).  
5  
6 15. He FJ, MacGregor GA. Reducing population salt intake worldwide: from evidence to  
7 implementation. *Prog Cardiovasc Dis* 2010;52:363-82.  
8  
9 16. INTERSALT. Intersalt Cooperative Research Group. Intersalt: an international study of  
10 electrolyte excretion and blood pressure. Results for 24 hour urinary sodium and  
11 potassium excretion. *BMJ* 1988;297:319-28.  
12  
13 17. Department of Health. Quality and Outcomes Framework.  
14 [http://wearchive.nationalarchives.gov.uk/+www.dh.gov.uk/en/Healthcare/Primarycare/](http://wearchive.nationalarchives.gov.uk/+www.dh.gov.uk/en/Healthcare/Primarycare/PMC/Quality/OutcomesFramework/index.htm)  
15 [PMC/Quality/OutcomesFramework/index.htm](http://wearchive.nationalarchives.gov.uk/+www.dh.gov.uk/en/Healthcare/Primarycare/PMC/Quality/OutcomesFramework/index.htm) (Accessed on 11 November 2013).  
16  
17 18. Serumaga B, Ross-Degnan D, Avery AJ, Elliott RA, Majumdar SR, Zhang F, et al. Effect  
18 of pay for performance on the management and outcomes of hypertension in the United  
19 Kingdom: interrupted time series study. *BMJ* 2011;342:d108.  
20  
21 19. Ramsay L, Williams B, Johnston G, MacGregor G, Poston L, Potter J, et al. Guidelines  
22 for management of hypertension: report of the third working party of the British  
23 Hypertension Society. *J Hum Hypertens* 1999;13:569-92.  
24  
25 20. Williams B, Poulter NR, Brown MJ, Davis M, McInnes GT, Potter JF, et al. Guidelines  
26 for management of hypertension: report of the fourth working party of the British  
27 Hypertension Society, 2004-BHS IV. *J Hum Hypertens* 2004;18:139-85.  
28  
29 21. National Institute for Health and Clinical Excellence (NICE). Hypertension: clinical  
30 management of primary hypertension in adults. Clinical guidelines, CG127 - Issued:  
31 August 2011. <http://guidance.nice.org.uk/CG127> (Accessed on 11 November 2013).  
32  
33 22. MacGregor GA, Markandu ND, Singer DR, Cappuccio FP, Shore AC, Sagnella GA.  
34 Moderate sodium restriction with angiotensin converting enzyme inhibitor in essential  
35 hypertension: a double blind study. *Br Med J (Clin Res Ed)* 1987;294:531-4.  
36  
37 23. Whelton PK, Appel LJ, Espeland MA, Applegate WB, Ettinger WH, Jr., Kostis JB, et al.  
38 Sodium reduction and weight loss in the treatment of hypertension in older persons: a  
39 randomized controlled trial of nonpharmacologic interventions in the elderly (TONE).  
40 TONE Collaborative Research Group. *JAMA* 1998;279:839-46.  
41  
42 24. Lewington S, Clarke R, Qizilbash N, Peto R, Collins R. Age-specific relevance of usual  
43 blood pressure to vascular mortality: a meta-analysis of individual data for one million  
44 adults in 61 prospective studies. *Lancet* 2002;360:1903-193.  
45  
46 25. He FJ, Li J, MacGregor GA. Effect of longer term modest salt reduction on blood  
47 pressure: Cochrane systematic review and meta-analysis of randomised trials. *BMJ*  
48 2013;346:f1325.  
49  
50 26. Aburto NJ, Ziolkovska A, Hooper L, Elliott P, Cappuccio FP, Meerpohl JJ. Effect of  
51 lower sodium intake on health: systematic review and meta-analyses. *BMJ*  
52 2013;346:f1326.  
53  
54 27. Wang Y, Rudd AG, Wolfe CD. Age and Ethnic Disparities in Incidence of Stroke Over  
55 Time: The South London Stroke Register. *Stroke* 2013.  
56  
57 28. Lee S, Shafe AC, Cowie MR. UK stroke incidence, mortality and cardiovascular risk  
58 management 1999-2008: time-trend analysis from the General Practice Research  
59 Database. *BMJ Open* 2011;1:e000269.  
60



- 1  
2  
3 29. Law MR, Morris JK, Wald NJ. Use of blood pressure lowering drugs in the prevention of  
4 cardiovascular disease: meta-analysis of 147 randomised trials in the context of  
5 expectations from prospective epidemiological studies. *BMJ* 2009;338:b1665.  
6  
7 30. Strazzullo P, D'Elia L, Kandala NB, Cappuccio FP. Salt intake, stroke, and cardiovascular  
8 disease: meta-analysis of prospective studies. *BMJ* 2009;339:b4567.  
9  
10 31. He FJ, MacGregor GA. Salt reduction lowers cardiovascular risk: meta-analysis of  
11 outcome trials. *Lancet* 2011;378:380-2.  
12  
13 32. Sasaki N. The salt factor in apoplexy and hypertension: epidemiological studies in Japan.  
14 In: Yamori Y, ed. Prophylactic Approach to Hypertensive Diseases. New York: Raven  
15 Press, 1979:467-74.  
16  
17 33. Karppanen H, Mervaala E. Sodium intake and hypertension. *Prog Cardiovasc Dis*  
18 2006;49:59-75.  
19  
20 34. Pietinen P, Valsta LM, Hirvonen T, Sinkko H. Labelling the salt content in foods: a  
21 useful tool in reducing sodium intake in Finland. *Public Health Nutr* 2008;11:335-40.  
22  
23 35. Laatikainen T, Pietinen P, Valsta L, Sundvall J, Reinivuo H, Tuomilehto J. Sodium in the  
24 Finnish diet: 20-year trends in urinary sodium excretion among the adult population. *Eur*  
25 *J Clin Nutr* 2006;60:965-70.  
26  
27 36. Morgenstern H. Ecologic studies in epidemiology: concepts, principles, and methods.  
28 *Annu Rev Public Health* 1995;16:61-81.  
29  
30  
31  
32  
33  
34  
35  
36  
37  
38  
39  
40  
41  
42  
43  
44  
45  
46  
47  
48  
49  
50  
51  
52  
53  
54  
55  
56  
57  
58  
59  
60

Table 1. Changes in demographic parameters, blood pressure and other variables from 2003 to 2011 in individuals who took part in the Health Survey for England

|                                                           | 2003<br>(N=14,836) | 2006<br>(N=14,142) | 2008<br>(N=15,098) | 2011<br>(N=8,610) | P value |
|-----------------------------------------------------------|--------------------|--------------------|--------------------|-------------------|---------|
| <b>Age (year)</b>                                         | 48.2±0.2           | 49.3±0.2           | 49.0±0.2           | 49.6±0.2          | <0.001  |
| <b>Sex, N (%)</b>                                         |                    |                    |                    |                   |         |
| Men                                                       | 6602 (45)          | 6324 (45)          | 6759 (45)          | 3822 (44)         |         |
| Women                                                     | 8234 (56)          | 7818 (55)          | 8339 (55)          | 4788 (56)         | 0.928   |
| <b>Ethnic group</b>                                       |                    |                    |                    |                   |         |
| White                                                     | 13626 (92)         | 12834 (91)         | 13639 (91)         | 7679 (90)         |         |
| Black                                                     | 314 (2)            | 337 (2)            | 356 (2)            | 220 (3)           |         |
| Mixed                                                     | 92 (1)             | 113 (1)            | 151 (1)            | 99 (1)            |         |
| Other                                                     | 769 (5)            | 823 (6)            | 893 (6)            | 572 (6)           | <0.001  |
| <b>Highest education qualification</b>                    |                    |                    |                    |                   |         |
| NVQ4/NVQ5/Degree equivalent                               | 2392 (16)          | 2711 (19)          | 2926 (20)          | 2008 (23)         |         |
| Lower than higher education                               | 1576 (11)          | 1583 (11)          | 1677 (11)          | 948 (11)          |         |
| NVQ3/GCE A level equivalent                               | 1734 (12)          | 1806 (13)          | 2191 (15)          | 1248 (15)         |         |
| NVQ2/GCE O level equivalent                               | 3519 (24)          | 3146 (22)          | 3262 (22)          | 1803 (21)         |         |
| NVQ1/GCE other equivalent                                 | 778 (5)            | 678 (5)            | 745 (5)            | 395 (5)           |         |
| Foreign or other                                          | 699 (5)            | 250 (2)            | 253 (2)            | 127 (2)           |         |
| No qualification                                          | 4097 (28)          | 3920 (28)          | 3983 (27)          | 2037 (24)         | <0.001  |
| <b>Household income in quintile (1 to 5, high to low)</b> |                    |                    |                    |                   |         |
| 1                                                         | 2386 (19)          | 1855 (16)          | 2132 (18)          | 1201 (18)         |         |
| 2                                                         | 2184 (17)          | 2321 (20)          | 2445 (20)          | 1418 (21)         |         |
| 3                                                         | 2732 (22)          | 2351 (21)          | 2363 (20)          | 1358 (20)         |         |
| 4                                                         | 2714 (22)          | 2409 (21)          | 2468 (21)          | 1407 (21)         |         |
| 5                                                         | 2522 (20)          | 2414 (21)          | 2649 (22)          | 1429 (21)         | <0.001  |

1  
2  
3  
4  
5  
6 **Frequency of alcohol consumption in past 12**  
7 **months**

|    |                                                    |            |            |            |            |        |
|----|----------------------------------------------------|------------|------------|------------|------------|--------|
| 8  | Every Day                                          | 2116 (14)  | 1864 (13)  | 1862 (12)  | 891 (10)   | <0.001 |
| 9  | 5/6 days/week                                      | 670 (5)    | 674 (5)    | 699 (5)    | 337 (4)    |        |
| 10 | 3/4 days/week                                      | 2229 (15)  | 1947 (14)  | 2212 (15)  | 1125 (13)  |        |
| 11 | Once or twice a week                               | 4301 (29)  | 3797 (27)  | 4036 (27)  | 2285 (27)  |        |
| 12 | Once or twice a month                              | 1745 (12)  | 1703 (12)  | 1923 (13)  | 1159 (14)  |        |
| 13 | Once every couple of months                        | 939 (6)    | 1039 (7)   | 1049 (7)   | 715 (8)    |        |
| 14 | Once or twice a year                               | 1156 (8)   | 1203 (9)   | 1222 (8)   | 673 (8)    |        |
| 15 | Not at all                                         | 1594 (11)  | 1817 (13)  | 1986 (13)  | 1343 (16)  |        |
| 16 |                                                    |            |            |            |            |        |
| 17 | <b>Fruit and vegetable consumption (portion/d)</b> | 3.4±0.02   | 3.8±0.02   | 3.7±0.02   | 3.6±0.03   | <0.001 |
| 18 |                                                    |            |            |            |            |        |
| 19 | <b>Body mass index (kg/m<sup>2</sup>)</b>          | 27.0±0.04  | 27.2±0.05  | 27.2±0.05  | 27.4±0.06  | <0.001 |
| 20 |                                                    |            |            |            |            |        |
| 21 | <b>Blood pressure (mmHg)</b>                       |            |            |            |            |        |
| 22 | Systolic                                           | 129.3±0.20 | 128.3±0.19 | 127.4±0.19 | 126.3±0.25 | <0.001 |
| 23 | Diastolic                                          | 74.2±0.12  | 73.6±0.12  | 73.3±0.12  | 72.8±0.16  | <0.001 |
| 24 |                                                    |            |            |            |            |        |
| 25 | <b>Total Cholesterol (mmol/L)</b>                  | 5.6±0.01   | 5.4±0.01   | 5.4±0.01   | 5.3±0.02   | <0.001 |
| 26 |                                                    |            |            |            |            |        |
| 27 | <b>HDL (mmol/L)</b>                                | 1.52±0.004 | 1.49±0.005 | 1.49±0.005 | 1.50±0.007 | <0.001 |
| 28 |                                                    |            |            |            |            |        |
| 29 | <b>Smoking Status</b>                              |            |            |            |            |        |
| 30 | Never smoked cigarettes at all                     | 6476 (44)  | 6574 (47)  | 7128 (48)  | 4032 (47)  |        |
| 31 | Used to smoke cigarettes occasionally              | 900 (6)    | 741 (5)    | 743 (5)    | 440 (5)    |        |
| 32 | Used to smoke cigarettes regularly                 | 3737 (25)  | 3667 (26)  | 3965 (26)  | 2353 (28)  |        |
| 33 | Current cigarette smoker                           | 3651 (25)  | 3074 (22)  | 3158 (21)  | 1707 (20)  | <0.001 |

1  
2  
3  
4  
5  
6  
7  
8  
9  
10  
11  
12  
13  
14  
15  
16  
17  
18  
19  
20  
21  
22  
23  
24  
25  
26  
27  
28  
29  
30  
31  
32  
33  
34  
35  
36  
37  
38  
39  
40  
41  
42  
43  
44  
45  
46  
47  
48  
49  
50  
51  
52  
53  
54  
55  
56  
57  
58  
59  
60

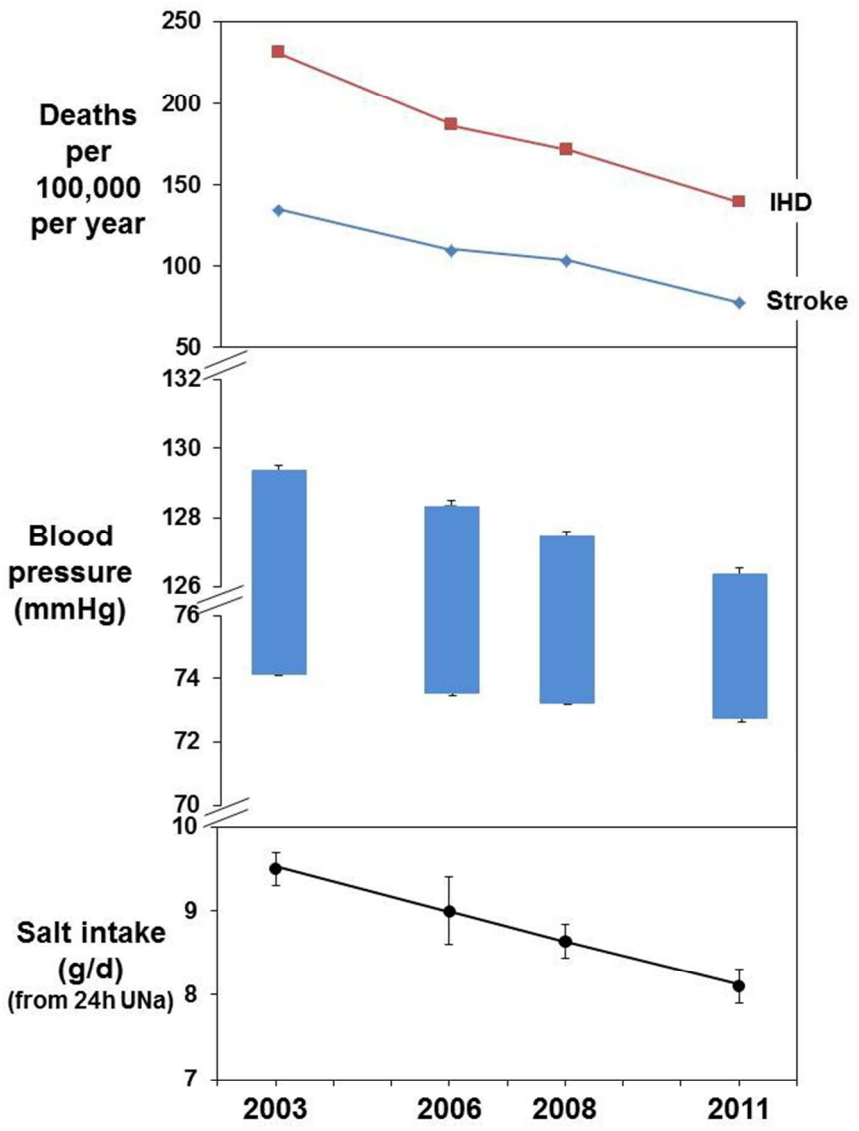

190x254mm (96 x 96 DPI)

## STROBE Statement—checklist of items that should be included in reports of observational studies

|                           | Item No | Recommendation                                                                                                                                                                                                                                                                                                                                                                                                                                                         | Page Number Reported |
|---------------------------|---------|------------------------------------------------------------------------------------------------------------------------------------------------------------------------------------------------------------------------------------------------------------------------------------------------------------------------------------------------------------------------------------------------------------------------------------------------------------------------|----------------------|
| <b>Title and abstract</b> | 1       | (a) Indicate the study's design with a commonly used term in the title or the abstract                                                                                                                                                                                                                                                                                                                                                                                 | 2                    |
|                           |         | (b) Provide in the abstract an informative and balanced summary of what was done and what was found                                                                                                                                                                                                                                                                                                                                                                    | 2                    |
| <b>Introduction</b>       |         |                                                                                                                                                                                                                                                                                                                                                                                                                                                                        |                      |
| Background/rationale      | 2       | Explain the scientific background and rationale for the investigation being reported                                                                                                                                                                                                                                                                                                                                                                                   | 4                    |
| Objectives                | 3       | State specific objectives, including any prespecified hypotheses                                                                                                                                                                                                                                                                                                                                                                                                       | 4                    |
| <b>Methods</b>            |         |                                                                                                                                                                                                                                                                                                                                                                                                                                                                        |                      |
| Study design              | 4       | Present key elements of study design early in the paper                                                                                                                                                                                                                                                                                                                                                                                                                | 4                    |
| Setting                   | 5       | Describe the setting, locations, and relevant dates, including periods of recruitment, exposure, follow-up, and data collection                                                                                                                                                                                                                                                                                                                                        | 5                    |
| Participants              | 6       | (a) <i>Cohort study</i> —Give the eligibility criteria, and the sources and methods of selection of participants. Describe methods of follow-up<br><i>Case-control study</i> —Give the eligibility criteria, and the sources and methods of case ascertainment and control selection. Give the rationale for the choice of cases and controls<br><i>Cross-sectional study</i> —Give the eligibility criteria, and the sources and methods of selection of participants | Not applicable       |
|                           |         | (b) <i>Cohort study</i> —For matched studies, give matching criteria and number of exposed and unexposed<br><i>Case-control study</i> —For matched studies, give matching criteria and the number of controls per case                                                                                                                                                                                                                                                 | Not applicable       |
| Variables                 | 7       | Clearly define all outcomes, exposures, predictors, potential confounders, and effect modifiers. Give diagnostic criteria, if applicable                                                                                                                                                                                                                                                                                                                               | 6                    |
| Data sources/measurement  | 8*      | For each variable of interest, give sources of data and details of methods of assessment (measurement). Describe comparability of assessment methods if there is more than one group                                                                                                                                                                                                                                                                                   | 4-5                  |
| Bias                      | 9       | Describe any efforts to address potential sources of bias                                                                                                                                                                                                                                                                                                                                                                                                              | 6                    |
| Study size                | 10      | Explain how the study size was arrived at                                                                                                                                                                                                                                                                                                                                                                                                                              | Not applicable       |
| Quantitative variables    | 11      | Explain how quantitative variables were handled in the analyses. If applicable, describe which groupings were chosen and why                                                                                                                                                                                                                                                                                                                                           | 6                    |
| Statistical methods       | 12      | (a) Describe all statistical methods, including those used to control for confounding                                                                                                                                                                                                                                                                                                                                                                                  | 6                    |
|                           |         | (b) Describe any methods used to examine subgroups and interactions                                                                                                                                                                                                                                                                                                                                                                                                    | Not applicable       |
|                           |         | (c) Explain how missing data were addressed                                                                                                                                                                                                                                                                                                                                                                                                                            | Not applicable       |
|                           |         | (d) <i>Cohort study</i> —If applicable, explain how loss to follow-up was addressed<br><i>Case-control study</i> —If applicable, explain how matching of cases and                                                                                                                                                                                                                                                                                                     | Not applicable       |

|                          |     |                                                                                                                                                                                                              |                                        |
|--------------------------|-----|--------------------------------------------------------------------------------------------------------------------------------------------------------------------------------------------------------------|----------------------------------------|
|                          |     | controls was addressed                                                                                                                                                                                       |                                        |
|                          |     | <i>Cross-sectional study</i> —If applicable, describe analytical methods taking account of sampling strategy                                                                                                 |                                        |
|                          |     | (e) Describe any sensitivity analyses                                                                                                                                                                        | Not applicable                         |
| <b>Results</b>           |     |                                                                                                                                                                                                              |                                        |
| Participants             | 13* | (a) Report numbers of individuals at each stage of study—eg numbers potentially eligible, examined for eligibility, confirmed eligible, included in the study, completing follow-up, and analysed            | Not applicable                         |
|                          |     | (b) Give reasons for non-participation at each stage                                                                                                                                                         | Not applicable                         |
|                          |     | (c) Consider use of a flow diagram                                                                                                                                                                           | Not applicable                         |
| Descriptive data         | 14* | (a) Give characteristics of study participants (eg demographic, clinical, social) and information on exposures and potential confounders                                                                     | Table 1, 18                            |
|                          |     | (b) Indicate number of participants with missing data for each variable of interest                                                                                                                          | Table 1                                |
|                          |     | (c) <i>Cohort study</i> —Summarise follow-up time (eg, average and total amount)                                                                                                                             | Not applicable                         |
| Outcome data             | 15* | <i>Cohort study</i> —Report numbers of outcome events or summary measures over time                                                                                                                          | Not applicable                         |
|                          |     | <i>Case-control study</i> —Report numbers in each exposure category, or summary measures of exposure                                                                                                         | Not applicable                         |
|                          |     | <i>Cross-sectional study</i> —Report numbers of outcome events or summary measures                                                                                                                           | 6-8                                    |
| Main results             | 16  | (a) Give unadjusted estimates and, if applicable, confounder-adjusted estimates and their precision (eg, 95% confidence interval). Make clear which confounders were adjusted for and why they were included | 7-8                                    |
|                          |     | (b) Report category boundaries when continuous variables were categorized                                                                                                                                    | Not applicable                         |
|                          |     | (c) If relevant, consider translating estimates of relative risk into absolute risk for a meaningful time period                                                                                             | Not applicable                         |
| Other analyses           | 17  | Report other analyses done—eg analyses of subgroups and interactions, and sensitivity analyses                                                                                                               | Subgroup analysis was not carried out. |
| <b>Discussion</b>        |     |                                                                                                                                                                                                              |                                        |
| Key results              | 18  | Summarise key results with reference to study objectives                                                                                                                                                     | 8                                      |
| Limitations              | 19  | Discuss limitations of the study, taking into account sources of potential bias or imprecision. Discuss both direction and magnitude of any potential bias                                                   | 10-11                                  |
| Interpretation           | 20  | Give a cautious overall interpretation of results considering objectives, limitations, multiplicity of analyses, results from similar studies, and other relevant evidence                                   | 11                                     |
| Generalisability         | 21  | Discuss the generalisability (external validity) of the study results                                                                                                                                        | 10-11                                  |
| <b>Other information</b> |     |                                                                                                                                                                                                              |                                        |
| Funding                  | 22  | Give the source of funding and the role of the funders for the present study and, if applicable, for the original study on which the present article is based                                                | 11                                     |

1  
2  
3 \*Give information separately for cases and controls in case-control studies and, if applicable, for exposed and  
4 unexposed groups in cohort and cross-sectional studies.  
5  
6

7 **Note:** An Explanation and Elaboration article discusses each checklist item and gives methodological background and  
8 published examples of transparent reporting. The STROBE checklist is best used in conjunction with this article (freely  
9 available on the Web sites of PLoS Medicine at <http://www.plosmedicine.org/>, Annals of Internal Medicine at  
10 <http://www.annals.org/>, and Epidemiology at <http://www.epidem.com/>). Information on the STROBE Initiative is  
11 available at [www.strobe-statement.org](http://www.strobe-statement.org).  
12  
13  
14  
15  
16  
17  
18  
19  
20  
21  
22  
23  
24  
25  
26  
27  
28  
29  
30  
31  
32  
33  
34  
35  
36  
37  
38  
39  
40  
41  
42  
43  
44  
45  
46  
47  
48  
49  
50  
51  
52  
53  
54  
55  
56  
57  
58  
59  
60

For peer review only



**Salt reduction in England from 2003 to 2011 – Its relationship to blood pressure, stroke and ischemic heart disease mortality**

|                                 |                                                                                                                                                                                                                                                                                          |
|---------------------------------|------------------------------------------------------------------------------------------------------------------------------------------------------------------------------------------------------------------------------------------------------------------------------------------|
| Journal:                        | <i>BMJ Open</i>                                                                                                                                                                                                                                                                          |
| Manuscript ID:                  | bmjopen-2013-004549.R1                                                                                                                                                                                                                                                                   |
| Article Type:                   | Research                                                                                                                                                                                                                                                                                 |
| Date Submitted by the Author:   | 21-Jan-2014                                                                                                                                                                                                                                                                              |
| Complete List of Authors:       | He, Feng; Queen Mary University of London, Wolfson Institute of Preventive Medicine<br>Pombo-Rodrigues, Sonia; Queen Mary University of London, Wolfson Institute of Preventive Medicine<br>MacGregor, Graham; Queen Mary University of London, Wolfson Institute of Preventive Medicine |
| <b>Primary Subject Heading</b>: | Public health                                                                                                                                                                                                                                                                            |
| Secondary Subject Heading:      | Epidemiology, Nutrition and metabolism, Cardiovascular medicine                                                                                                                                                                                                                          |
| Keywords:                       | dietary salt, blood pressure , cardiovascular mortality , England                                                                                                                                                                                                                        |
|                                 |                                                                                                                                                                                                                                                                                          |

SCHOLARONE™  
Manuscripts



1  
2  
3 **Salt reduction in England from 2003 to 2011 – Its relationship to blood pressure, stroke**  
4  
5 **and ischemic heart disease mortality**  
6  
7  
8

9 Feng J He, Sonia Pombo-Rodrigues, Graham A MacGregor  
10

11  
12  
13 Wolfson Institute of Preventive Medicine, Barts and The London School of Medicine & Dentistry,  
14  
15 Queen Mary University of London, UK  
16  
17  
18  
19  
20  
21  
22  
23  
24

25  
26 **Running title:** Salt reduction, BP, stroke and IHD mortality  
27  
28  
29  
30  
31  
32  
33  
34  
35  
36  
37

38 Correspondence to:

39 Dr. Feng He

40 Wolfson Institute of Preventive Medicine,

41 Barts and The London School of Medicine & Dentistry,

42 Queen Mary University of London,

43 Charterhouse Square,

44 London EC1M 6BQ.

45 Tel: 44 (0)20 7882 6266

46 Fax: 44 (0)20 7882 6270

47 E-mail: f.he@qmul.ac.uk  
48  
49  
50  
51  
52  
53  
54  
55  
56  
57  
58  
59  
60

## Abstract

**Objectives:** To determine the relationship between the reduction in salt intake that occurred in England, and blood pressure (BP), as well as mortality from stroke and ischemic heart disease (IHD).

**Design:** Analysis of the data from the Health Survey for England.

**Setting and participants:** England, 2003 N=9,183, 2006 N=8,762, 2008 N=8,974 and 2011 N=4,753, aged  $\geq 16$  years.

**Outcomes:** BP, stroke and IHD mortality.

**Results:** From 2003 to 2011, there was a decrease in mortality from stroke by 42% ( $P < 0.001$ ) and IHD by 40% ( $P < 0.001$ ). In parallel, there was a fall in BP of  $3.0 \pm 0.33 / 1.4 \pm 0.20$  mmHg ( $P < 0.001 / P < 0.001$ ), a decrease of  $0.4 \pm 0.02$  mmol/L ( $P < 0.001$ ) in cholesterol, a reduction in smoking from 19% to 14% ( $P < 0.001$ ), an increase in fruit and vegetable consumption ( $0.2 \pm 0.05$  portion/d,  $P < 0.001$ ), and an increase in body mass index (BMI) ( $0.5 \pm 0.09$  kg/m<sup>2</sup>,  $P < 0.001$ ). Salt intake as measured by 24-hour urinary sodium decreased by 1.4 g/d ( $P < 0.01$ ). It is likely that all of these factors (with the exception of BMI), along with improvements in the treatments of BP, cholesterol and CVD contributed to the falls in stroke and IHD mortality. In individuals who were not on anti-hypertensive medication, there was a fall in BP of  $2.7 \pm 0.34 / 1.1 \pm 0.23$  mmHg ( $P < 0.001 / P < 0.001$ ) after adjusting for age, sex, ethnic group, education, household income, alcohol consumption, fruit and vegetable intake, and BMI. Although salt intake was not measured in these participants, the fact that the average salt intake in a random sample of the UK population fell by 15% during the same period, suggests that the falls in BP would be largely attributable to the reduction in salt intake rather than anti-hypertensive medications.

1  
2  
3 **Conclusions:** The reduction in salt intake is likely to be an important contributor to the falls  
4  
5 in BP from 2003 to 2011 in England. As a result, it would have substantially contributed to  
6  
7 the decreases in stroke and IHD mortality.  
8  
9  
10  
11  
12  
13  
14  
15  
16  
17  
18  
19  
20  
21  
22  
23  
24  
25  
26  
27  
28  
29  
30  
31  
32  
33  
34  
35  
36  
37  
38  
39  
40  
41  
42  
43  
44  
45  
46  
47  
48  
49  
50  
51  
52  
53  
54  
55  
56  
57  
58  
59  
60

For peer review only

## ARTICLE SUMMARY

### Article focus

- A modest reduction in salt intake lowers blood pressure (BP) and, thereby, reduces cardiovascular risk.
- In the UK, salt intake as measured by 24-hour urinary sodium excretion decreased from 9.5 to 8.1 g/d from 2003 to 2011. During the same period, in England there was a fall of 3.0/1.4 mmHg in BP and a decrease of 42% and 40% in stroke and ischemic heart disease (IHD) mortality respectively.

### Key messages

- Our analysis of the data from the Health Survey for England showed that, in individuals who were not on any anti-hypertensive medications or other medications which might affect BP, there was a significant fall in BP of 2.7/1.1 mmHg from 2003 to 2011 after taking into account almost all major factors known to be associated with BP, including age, sex, ethnic group, education level, household income, alcohol consumption, fruit and vegetable intake and body mass index. Salt intake, a major determinant of population BP, was not included in this analysis because it was not measured in these participants. However, the fact that salt intake fell by 15% during the same period, would suggest that the falls in BP were largely attributable to the reduction in salt intake.
- As BP throughout its range is a major cause of stroke and IHD, the reduction in salt intake would have played an important role in the reduction in stroke and IHD mortality which occurred in England during this period.

### Strengths and limitations of this study

- The study used the best available data in England.
- Various surveys included different sets of participants. Therefore, the results of our study are potentially subject to ecological bias.

## Introduction

Cardiovascular disease (CVD) is the leading cause of death and disability worldwide.<sup>1</sup> Unhealthy diet and lifestyle factors are responsible for approximately 80% of CVD.<sup>2</sup> Among all of the risk factors for CVD, raised blood pressure (BP) is a major one, accounting for 62% of stroke and 49% of ischemic heart disease (IHD).<sup>3</sup> The recent analysis of global disease burden shows that raised BP is the leading risk factor, accounting for approximately 7% global disability adjusted life-years in 2010 and contributing to about 9.4 million deaths per year worldwide.<sup>4</sup>

In England, the average population BP has fallen in recent years<sup>5</sup> and CVD mortality has also declined.<sup>6</sup> These could be attributable to various factors such as changes in diet and lifestyle, as well as improvements in the treatments of BP, cholesterol and CVD.<sup>6</sup> An analysis of the data from the Health Survey for England showed that anti-hypertensive medications accounted for less than 25% of the systolic BP decline in men over the period of 1994-2002 and 2003-2009.<sup>7</sup> A population modelling study showed that reductions in major cardiovascular risk factors explained 43% of the recent fall in IHD mortality in England and the single largest contribution to the overall IHD mortality decrease came from falls in population BP with relatively small contributions from anti-hypertensive therapies.<sup>8</sup>

Evidence from various types of studies has consistently shown that a reduction in salt intake lowers BP and thereby reduces CVD risk.<sup>9-12</sup> A meta-analysis of relatively short-term salt reduction trials showed a dose-response relationship with a 1 g/d reduction in salt intake relating to approximately 1 mmHg fall in systolic BP.<sup>9</sup> The UK initiated a nationwide salt reduction programme in 2003/2004.<sup>13</sup> The programme has been successful and resulted in a 15% reduction in population salt intake by 2011.<sup>14</sup> To determine the relationship between this reduction in salt intake and the fall in BP and mortality from stroke and IHD, we

1  
2  
3 analysed the data from a series of health surveys carried out in a nationally representative  
4  
5 sample of the population in England.  
6  
7

## 8 **Methods**

### 9 **Data sources**

#### 10 **Health Survey for England**

11  
12 We used the BP and other CVD risk factor data from the Health Survey for England,<sup>5 15-18</sup>  
13  
14 which is an annual survey of a random sample of the English population living in private  
15  
16 households. Data were obtained from the UK Data Service. The methods used in the Health  
17  
18 Survey for England were reported in detail elsewhere<sup>5</sup> and only methods relevant to the  
19  
20 current analysis are described in brief here.  
21  
22  
23  
24

25  
26 We used the Health Survey for England data for 2003,<sup>15</sup> 2006,<sup>16</sup> 2008<sup>17</sup> and 2011<sup>18</sup>. We  
27  
28 included participants aged  $\geq 16$  years and who had BP measurements recorded (2003  
29  
30 N=9,183, 2006 N=8,762, 2008 N=8,974 and 2011 N=4,753). In all surveys, the interviewers  
31  
32 recorded demographic information, smoking status and consumption of alcohol, fruit and  
33  
34 vegetables. Trained nurses measured body weight, height and BP. Since 2003, BP has been  
35  
36 measured using Omron HEM207 using a standardised protocol in all surveys. BP was  
37  
38 measured in a seated position after the participant had five minutes' rest, using an  
39  
40 appropriately sized cuff on the right arm. Three BP readings were taken from each participant  
41  
42 at one minute intervals and the mean of the last two readings was used in the analysis.  
43  
44  
45  
46

#### 47 **National Diet and Nutrition Survey**

48  
49  
50 The mean salt intake as measured by 24-hour urinary sodium was taken from the National  
51  
52 Diet and Nutrition Survey (NDNS) in participants aged 19-64 years.<sup>14</sup> In the 2000/2001  
53  
54 survey, 24-hour urine was collected in a random sample of adults in Great Britain (N=1147).  
55  
56 In the 2005/2006 survey, 24-hour urine was collected in a random sample of adults in  
57  
58  
59  
60

1  
2  
3 England (N=350) which was part of the Health Survey for England. In 2008, the 24-hour  
4  
5 urine collection was made in a random sample of adults in the UK (N=692) and, in 2011, 24-  
6  
7 hour urine was collected in a random sample of adults in England (N=547). In all surveys, the  
8  
9 completeness of the 24-hour urine collection was assessed using the para-aminobenzoic acid  
10  
11 (PABA) recovery method.<sup>19,20</sup>  
12  
13

### 14 **Office for National Statistics**

15  
16  
17 From the Office for National Statistics, we obtained the number of deaths from IHD (I20-  
18  
19 I25), cerebrovascular diseases (I60-I69) and mid-year population estimates aged  $\geq 15$  years  
20  
21 for England and Wales.<sup>21-24</sup> Deaths were certified by medical practitioners, using the Medical  
22  
23 Certificate of Cause of Death.<sup>21</sup>  
24  
25  
26  
27

### 28 **Statistical analysis**

29  
30  
31 Stroke and IHD mortality was calculated as the number of stroke or IHD deaths divided by  
32  
33 the population. Descriptive data on salt intake, BP and other continuous variables were  
34  
35 reported as mean $\pm$ SE. Comparisons among the four years (2003, 2006, 2008 and 2011) were  
36  
37 made by One-Way ANOVA for continuous variables and by  $\chi^2$  test for categorical variables.  
38  
39  
40

41  
42 To estimate the contribution of salt intake to the changes of BP and to exclude any potential  
43  
44 confounding effect of treatments, we performed a separate analysis that included only  
45  
46 individuals who were not on any anti-hypertensive medications or other medications that  
47  
48 might affect BP. We compared BP in 2011 with that in 2003 using multiple regression  
49  
50 analysis, with adjustment for potential confounding factors. In the regression model, systolic  
51  
52 or diastolic BP was entered as the dependent variable and the independent variables included  
53  
54 year (1=2011 and 0=2003), age, sex (1=male and 0=female), ethnic group (1=white and  
55  
56 0=other), education level (1=A level or above and 0=other), household income (1=top 3  
57  
58  
59  
60

1  
2  
3 quintiles and 0=bottom 2 quintiles), alcohol consumption (1=once or more a month and  
4  
5 0=less than once a month), fruit and vegetable intake, and body mass index (BMI).  
6  
7

8  
9 As 24-hour urinary sodium was not measured in the individuals who participated in the  
10 Health Survey for England, where BP and other CVD risk factors were recorded, we assumed  
11 that the changes in BP from 2003 to 2011, after adjusting for the above variables which  
12 included almost all other major factors known to be related to BP, were largely attributable to  
13 the changes in population salt intake which occurred during the same period.  
14  
15  
16  
17  
18  
19

20  
21 We also performed a separate analysis that included only individuals aged 19-64 years  
22 examining the trend of BP and stroke and IHD mortality, as the age range was the same as  
23 those participants who had 24-hour urinary sodium measured. All statistical analyses were  
24 carried out using Statistical Package for Social Science (SPSS).  
25  
26  
27  
28  
29  
30

## 31 **Results**

### 32 **Stroke and IHD mortality**

33  
34 In 2003, the mortality rates from stroke were 134/100,000 and the mortality rates from IHD  
35 were 232/100,000 for the adult population in England. As shown in Figure 1, there had been  
36 a gradual reduction in both stroke and IHD mortality. By 2011, stroke mortality decreased to  
37 78/100,000 ( $P<0.001$ ) and IHD mortality decreased to 139/100,000 ( $P<0.001$ ). Therefore,  
38 from 2003 to 2011, there was a reduction in mortality by 42% and 40% for stroke and IHD  
39 respectively.  
40  
41  
42  
43  
44  
45  
46  
47  
48  
49

### 50 **BP and other CVD risk factors**

51  
52 Table 1 showed the comparisons among the four years (2003, 2006, 2008 and 2011) in  
53 demographics and CVD risk factors. The mean age was slightly but significantly higher in  
54 2011 compared with that in 2003. Despite this, the mean BP fell from  $129.3\pm 0.20/74.2\pm 0.12$   
55  
56  
57  
58  
59  
60



1  
2  
3 mmHg in 2003 to  $126.3 \pm 0.25 / 72.8 \pm 0.16$  mmHg in 2011 (i.e. a fall of  $3.0 \pm 0.33 / 1.4 \pm 0.20$   
4  
5 mmHg,  $P < 0.001$  for both systolic and diastolic BP). From 2003 to 2011, there was a decrease  
6  
7 of  $0.4 \pm 0.02$  mmol/L ( $P < 0.001$ ) in total cholesterol, a reduction in smoking prevalence from  
8  
9 19% to 14% ( $P < 0.001$ ), and an increase in fruit and vegetable consumption of  $0.2 \pm 0.05$   
10  
11 portion/d ( $P < 0.001$ ). At the same time, there was a small but significant increase in body  
12  
13 mass index (BMI) by  $0.5 \pm 0.09$  kg/m<sup>2</sup> ( $P < 0.001$ ) and a small decrease in HDL (by  $0.02 \pm 0.01$   
14  
15 mmol/L,  $P < 0.05$ ).

16  
17  
18  
19  
20 The average salt intake, as measured by 24-hour urinary sodium excretion in a random  
21  
22 sample of the adult population, was  $9.5 \pm 0.2$  g/d in 2000/2001. Salt intake fell to  $9.0 \pm 0.4$  g/d  
23  
24 in 2005/2006,  $8.64 \pm 0.2$  g/d in 2008, and fell further to  $8.1 \pm 0.2$  g/d by 2011.<sup>14</sup> Therefore, from  
25  
26 2003 to 2011, salt intake decreased by 1.4 g/d (i.e. 15%,  $P < 0.05$  for the downward trend).<sup>14</sup>  
27  
28

29  
30 It is likely that several factors, i.e. the fall in BP, total cholesterol and smoking prevalence,  
31  
32 the reduction in salt intake and the increase in the consumption of fruit and vegetables, along  
33  
34 with improvements in the treatments of BP, cholesterol and CVD, contributed to the decrease  
35  
36 in stroke and IHD mortality.  
37  
38

### 39 **BP in untreated individuals**

40  
41 To investigate the role of salt reduction in the changes of BP, we compared the BP in 2011  
42  
43 with that in 2003 with adjustment for potential confounding factors. In order to further  
44  
45 exclude any potential confounding effect of BP treatments, we included only individuals who  
46  
47 were not on any anti-hypertensive medications or other medications that might affect BP.  
48  
49

50  
51 The results showed that there was a fall in BP of  $2.7 \pm 0.34 / 1.1 \pm 0.23$  mmHg ( $P < 0.001$  for both  
52  
53 systolic and diastolic BP) from 2003 to 2011 after adjusting for age, sex, ethnic group,  
54  
55 education level, household income, alcohol consumption, fruit and vegetable intake and BMI.  
56  
57  
58  
59  
60

1  
2  
3 These variables altogether explained 28% of the variance of systolic BP and 16% of the  
4  
5 variance of diastolic BP.  
6

7  
8 Salt intake was not included in the above regression model because it was not measured in  
9  
10 the same participants whose BP was recorded. However, the fact that after adjusting for  
11  
12 almost all other major factors known to be associated with BP, there was still a significant  
13  
14 fall in BP of 2.7/1.1 mmHg from 2003 to 2011, would suggest that these falls in BP were  
15  
16 likely to be largely attributable to the reduction in population salt intake which occurred  
17  
18 during this period.  
19

### 20 21 22 **BP and stroke and IHD mortality in individuals aged 19-64 years**

23  
24 Our above conclusions were based on the assumption that the 15% reduction in salt intake  
25  
26 occurred in the whole adult population in England. However, 24-hour urinary sodium was  
27  
28 measured only in individuals aged 19-64 years. We have therefore performed separate  
29  
30 analyses on the trend of BP and stroke and IHD mortality in individuals of the same age  
31  
32 groups as those who had salt intake measured. The results showed that, from 2003 to 2011,  
33  
34 stroke mortality decreased from 128/1,000,000 to 82/1,000,000 (36% reduction,  $P < 0.001$ )  
35  
36 and IHD mortality decreased from 423/1,000,000 to 272/1,000,000 (36% reduction,  
37  
38  $P < 0.001$ ). In individuals who were not on any anti-hypertensive medications or other  
39  
40 medications that might affect BP, there was a fall in BP of  $1.9 \pm 0.34 / 1.0 \pm 0.25$  mmHg  
41  
42 ( $P < 0.001$  for both systolic and diastolic BP) from 2003 to 2011 after adjusting for age, sex,  
43  
44 ethnic group, education level, household income, alcohol consumption, fruit and vegetable  
45  
46 intake and BMI.  
47  
48  
49  
50

### 51 52 **Discussion**

53  
54 Our analyses showed that the average BP in the adult population in England decreased by  
55  
56 3.0/1.4 mmHg from 2003 to 2011. This could be attributable to various factors such as the  
57  
58

1  
2  
3 reduction in salt intake, the increase in fruit and vegetable consumption, and the improvement  
4  
5 in BP treatment and control. However, our findings that, in untreated individuals, there was a  
6  
7 fall in BP of 2.7/1.1 mmHg after taking into account age, sex, ethnic group, education level,  
8  
9 household income, alcohol consumption, fruit and vegetable intake and BMI, suggest that the  
10  
11 reduction in population salt intake which occurred from 2003 to 2011, is likely to be an  
12  
13 important contributor to the falls in BP. Although 24-hour urinary sodium was measured in  
14  
15 individuals aged 19-64 years, the reduction in salt intake is likely to have occurred across the  
16  
17 whole population as it was predominately achieved by a gradual reduction in the amount of  
18  
19 salt added to all processed foods, which accounts for approximately 80% of total salt intake.<sup>13</sup>  
20  
21

22  
23  
24 Our findings that the recent falls in BP occurred in England are largely attributable to the  
25  
26 reduction in salt intake rather than drug therapies, are consistent with the analysis by  
27  
28 DeWilde et al who showed that anti-hypertensive medications contributed to less than 25% of  
29  
30 the systolic BP decline in man.<sup>7</sup>  
31  
32

33  
34 Although our analysis focused on individuals who were not on any BP medications, there is  
35  
36 clear evidence that, in individuals who are on antihypertensive drug treatments, a reduction in  
37  
38 salt intake is additive to drug therapies,<sup>25 26</sup> particularly drugs that block the renin-angiotensin  
39  
40 system.<sup>25</sup> Therefore, salt reduction would also have contributed to the falls in BP in those  
41  
42 who were on BP medications.  
43  
44

45  
46 The observed fall in systolic BP was larger than that might have been predicted from the  
47  
48 meta-analysis of randomised salt reduction trials.<sup>9</sup> This may be due to the difference in age  
49  
50 and duration of the studies. It has been shown that, for a given reduction in salt intake, the fall  
51  
52 in BP is larger in older people compared with younger individuals.<sup>9</sup> Indeed, our current  
53  
54 analysis showed that in individuals aged 19-64 years, the fall in BP from 2003 to 2011 was  
55  
56 smaller compared with that observed when all adults were included. Another important factor  
57  
58  
59  
60

1  
2  
3 which may account for the observed larger fall in BP is the longer duration of the study, i.e.  
4  
5 over a period of 8 years. Most salt reduction trials had a duration of only a few weeks and the  
6  
7 median duration for the trials included in the meta-analysis was only 5 weeks in hypertensive  
8  
9 individuals and 4 weeks in normotensive individuals.<sup>9</sup> Whether salt reduction has exerted its  
10  
11 maximum effect by 4-5 weeks is not known, but much evidence would suggest that this is  
12  
13 unlikely. It is possible that a long-term reduction in population salt intake as reported in our  
14  
15 current analysis, could have a greater effect on BP than that observed in the salt reduction  
16  
17 trials with a duration of only a few weeks.  
18  
19

20  
21 It is well established that raised BP throughout its range is a major cause of CVD.<sup>27</sup> A  
22  
23 reduction in salt intake through its effect on BP would reduce CVD.<sup>9 11</sup> Additionally,  
24  
25 increasing evidence suggests that salt reduction may have a direct beneficial effect on  
26  
27 reducing CVD, independent of BP.<sup>10</sup> It is therefore, of interest, that we found a decrease in  
28  
29 both stroke and IHD mortality in parallel with the reduction in salt intake and the falls in BP  
30  
31 from 2003 to 2011 in England. Various other studies have documented a reduction in the  
32  
33 incidence of CVD. For example, a study using the South London Stroke Register showed that  
34  
35 the incidence of stroke decreased from 247/100,000 in 1995 to 149.5/100,000 in 2010 (i.e. a  
36  
37 reduction of 39.5% over 16 years),<sup>28</sup> and an analysis of the General Practice Research  
38  
39 Database showed that the incidence of stroke in the UK fell by 29% between 1999 and  
40  
41 2008.<sup>29</sup>  
42  
43  
44  
45

46 It is difficult to quantify the relative contribution of salt reduction to the decrease of CVD as  
47  
48 several other dietary and lifestyle factors as well as treatments all have played a part.  
49

50 However, based on the meta-analysis of BP treatment trials where a 10 mmHg reduction in  
51  
52 systolic BP was related to a decrease of 41% in stroke and 22% in IHD,<sup>30</sup> it was estimated  
53  
54 that a 2.7 mmHg reduction in systolic BP that occurred with salt reduction would be  
55  
56 predicted to reduce stroke by approximately 11% and IHD by 6%. Therefore, salt reduction is  
57  
58  
59  
60

1  
2  
3 likely to have played an important role in the decreases of stroke and IHD mortality in  
4  
5 England. These results are supported by the evidence from both prospective cohort studies  
6  
7 and outcome trials which have demonstrated that a reduction in salt intake is related to a  
8  
9 decrease in CVD risk.<sup>11 12 31</sup> A cost-effective analysis by National Institute for Health and  
10  
11 Clinical Excellence (NICE) shows that salt reduction not only saves lives, but also saves  
12  
13 money, and the reduction in salt intake achieved in the UK has saved more than £1.5 billion  
14  
15 per annum.<sup>32</sup>

16  
17  
18 Our findings that a reduction in population salt intake was related to a fall in population BP  
19  
20 and mortality from stroke and IHD in England are in agreement with those observed in Japan  
21  
22 and Finland.<sup>33 34</sup> Japan, in the late 1960s, carried out a government-led campaign to reduce  
23  
24 salt intake. Over the following decade, salt intake was reduced, particularly in northern areas  
25  
26 from 18 to 14 g/d. Paralleling this reduction in salt intake, there were falls in BP and an 80%  
27  
28 reduction in stroke mortality<sup>33</sup> in spite of large increases in fat intake, cigarette smoking,  
29  
30 alcohol consumption and obesity which occurred during that period. Finland, in the late  
31  
32 1970s, initiated a systematic approach to reducing salt intake through mass media-campaigns,  
33  
34 co-operation with the food industry and implementing salt labelling legislation.<sup>34 35</sup> This led  
35  
36 to a significant reduction in the average salt intake of the Finnish population<sup>34 35</sup> from ≈14 g/d  
37  
38 in 1972 to less than 9 g/d in 2002.<sup>34</sup> The reduction in salt intake was accompanied by a fall of  
39  
40 over 10 mmHg in both systolic and diastolic BP and a decrease of 75-80% in both stroke and  
41  
42 IHD mortality. Although these results were attributable to several factors, the reduction in  
43  
44 salt intake is likely to have played a major role, particularly in the fall in BP as BMI and  
45  
46 alcohol consumption increased during that time.

47  
48  
49  
50  
51  
52  
53 **Strengths and limitations:** The strength of our analysis is that we used the data from a  
54  
55 nationally representative sample of the population in England. However, there are several  
56  
57 potential limitations. First, our study used an ecological design that is subject to various  
58  
59

1  
2  
3 methodological issues.<sup>36</sup> Because we used data from national surveys that included different  
4  
5 sets of participants both cross-sectionally and longitudinally, we were unable to work with  
6  
7 data at the individual level, particularly as salt intake was not measured in the same  
8  
9 participants who had BP and other CVD risk factors recorded. Therefore, the results of our  
10  
11 study are potentially subject to ecological bias. Second, we could not exclude potential  
12  
13 confounding effect of some variables which were not measured, such as physical activity  
14  
15 levels which were recorded in 2003, but not in the 2011 survey. Third, the trend in 24-hour  
16  
17 urinary sodium was taken from the data either for England, Great Britain or the UK, as the  
18  
19 original report did not separate the results by countries. It has been shown that salt intake was  
20  
21 higher in Scotland and lower in Wales compared with that in England.<sup>14 37</sup> A difference in the  
22  
23 composition of the population surveyed at different years may cause a bias to the trend in 24-  
24  
25 hour urinary sodium. However, Scotland, Wales and Northern Ireland account for only a  
26  
27 small proportion of the UK population (altogether 16%). Additionally, the lower salt intake in  
28  
29 Wales and higher salt intake in Scotland might balance each other out to a certain degree in  
30  
31 the 2003 NDNS. Therefore, the 24-hour urinary sodium data for 2003 (Great Britain) and  
32  
33 2011 (England only) were likely to be comparable.  
34  
35  
36  
37  
38

### 39 **Conclusions**

40  
41 The reduction in salt intake is likely to be an important contributor to the falls in BP in  
42  
43 England from 2003 to 2011. As a result, the decrease in salt intake would have played an  
44  
45 important role in the reduction in stroke and IHD mortality during this period. Despite  
46  
47 considerable progress being made on salt reduction, the mean salt intake in the UK  
48  
49 population (8.1 g/d in 2011) was still 35% higher than the recommended level of 6 g/d, and  
50  
51 70% of the adult population (80% men and 58% women) had a daily salt intake above the  
52  
53 recommended level.<sup>14</sup> Therefore, continuing and much greater efforts are needed to achieve  
54  
55 further reductions in salt intake to prevent the maximum number of stroke and IHD deaths.  
56  
57  
58  
59  
60

1  
2  
3  
4  
5  
6 **Acknowledgement:** We thank the original data creators, depositors, copyright holders, the  
7 funders of the Data Collections, and the UK Data Service for the use of data from the Health  
8 Survey for England. They bear no responsibility for the current analysis or interpretation of  
9 the results.  
10

11  
12  
13  
14  
15 **Contributors:** FJH and GAM designed the analysis plan. FJH performed statistical analyses  
16 and wrote the first draft of the manuscript. SPR contributed to database organisation and  
17 variable selections. All authors contributed to the interpretation of the results and revision of  
18 the manuscript. FJH is guarantor.  
19  
20  
21  
22

23  
24  
25 **Funding:** The study did not receive any funding.  
26

27  
28 **Competing interests:** All authors have completed the ICMJE uniform disclosure form at  
29 [www.icmje.org/coi\\_disclosure.pdf](http://www.icmje.org/coi_disclosure.pdf) (available on request from the corresponding author) and  
30 declare: no support from any organisation for the submitted work; no financial relationships  
31 with any organisations that might have an interest in the submitted work in the previous three  
32 years. FJH is a member of Consensus Action on Salt & Health (CASH) and World Action on  
33 Salt & Health (WASH). Both CASH and WASH are non-profit charitable organisations and  
34 FJH does not receive any financial support from CASH or WASH. GAM is Chairman of  
35 Blood Pressure UK (BPUK), Chairman of CASH and Chairman of WASH. BPUK, CASH  
36 and WASH are non-profit charitable organisations. GAM does not receive any financial  
37 support from any of these organisations. SPR is an employee of CASH.  
38  
39  
40  
41  
42  
43  
44  
45  
46  
47  
48  
49  
50  
51

52 **Ethics committee approval:** Our study is an analysis of previously collected data and  
53 therefore ethical approval was not required for our analysis. Ethical approval for the Health  
54 Survey for England was obtained by the survey team.  
55  
56  
57  
58  
59  
60

1  
2  
3  
4  
5 **Data sharing statement:** No additional data are available. The data are already in the public  
6 domain.  
7  
8  
9  
10  
11  
12  
13  
14  
15  
16  
17  
18  
19  
20  
21  
22  
23  
24  
25  
26  
27  
28  
29  
30  
31  
32  
33  
34  
35  
36  
37  
38  
39  
40  
41  
42  
43  
44  
45  
46  
47  
48  
49  
50  
51  
52  
53  
54  
55  
56  
57  
58  
59  
60

For peer review only



1  
2  
3 **Legend to Figure**  
4

5 **Figure 1.** Changes in salt intake as measured by 24-hour urinary sodium (UNa) excretion,  
6  
7 blood pressure (BP), stroke and ischemic heart disease (IHD) mortality in England from 2003  
8  
9 to 2011. \* P<0.05, \*\*\* P<0.001 for trend.  
10  
11  
12  
13  
14  
15  
16  
17  
18  
19  
20  
21  
22  
23  
24  
25  
26  
27  
28  
29  
30  
31  
32  
33  
34  
35  
36  
37  
38  
39  
40  
41  
42  
43  
44  
45  
46  
47  
48  
49  
50  
51  
52  
53  
54  
55  
56  
57  
58  
59  
60

For peer review only

## References

1. Lozano R, Naghavi M, Foreman K, et al. Global and regional mortality from 235 causes of death for 20 age groups in 1990 and 2010: a systematic analysis for the Global Burden of Disease Study 2010. *Lancet* 2012;380:2095-128.
2. World Health Organization. Global status report on noncommunicable diseases. 2010. [http://whqlibdoc.who.int/publications/2011/9789240686458\\_eng.pdf](http://whqlibdoc.who.int/publications/2011/9789240686458_eng.pdf) (Accessed on 29 October 2013).
3. World Health Report 2002: Reducing risks, promoting healthy life. Geneva, Switzerland: World Health Organisation, 2002. [www.who.int/whr/2002](http://www.who.int/whr/2002) (Accessed 3 June 2013).
4. Lim SS, Vos T, Flaxman AD, et al. A comparative risk assessment of burden of disease and injury attributable to 67 risk factors and risk factor clusters in 21 regions, 1990-2010: a systematic analysis for the Global Burden of Disease Study 2010. *Lancet* 2012;380:2224-60.
5. Health Survey for England. <http://www.hscic.gov.uk/catalogue/PUB09300> (Accessed on 16 January 2014).
6. O'Flaherty M, Buchan I, Capewell S. Contributions of treatment and lifestyle to declining CVD mortality: why have CVD mortality rates declined so much since the 1960s? *Heart* 2013;99:159-62.
7. DeWilde SJ, Carey IM, Shah SM, et al. Trend in blood pressure in England: Good treatment or good luck? *J Epidemiol Community Health* 2012;66(Suppl 1):A41.
8. Bajekal M, Scholes S, Love H, et al. Analysing recent socioeconomic trends in coronary heart disease mortality in England, 2000-2007: a population modelling study. *PLoS Med* 2012;9:e1001237.
9. He FJ, Li J, MacGregor GA. Effect of longer term modest salt reduction on blood pressure: Cochrane systematic review and meta-analysis of randomised trials. *BMJ* 2013;346:f1325.
10. He FJ, MacGregor GA. Reducing population salt intake worldwide: from evidence to implementation. *Prog Cardiovasc Dis* 2010;52:363-82.
11. Aburto NJ, Ziolkovska A, Hooper L, et al. Effect of lower sodium intake on health: systematic review and meta-analyses. *BMJ* 2013;346:f1326.
12. He FJ, MacGregor GA. Salt reduction lowers cardiovascular risk: meta-analysis of outcome trials. *Lancet* 2011;378:380-2.
13. He FJ, Brinsden HC, Macgregor GA. Salt reduction in the United Kingdom: a successful experiment in public health. *J Hum Hypertens* 2013:advance online publication, 31 October 2013; doi:10.1038/jhh.2013.105.
14. Department of Health: Assessment of Dietary Sodium Levels Among Adults (aged 19-64) in England, 2011. <http://transparency.dh.gov.uk/2012/06/21/sodium-levels-among-adults/> (Accessed 25 June 2012).
15. National Centre for Social Research and University College London. Department of Epidemiology and Public Health, Health Survey for England, 2003 [computer file]. 2nd Edition. Colchester, Essex: UK Data Archive [distributor], April 2010. SN: 5098 , <http://dx.doi.org/10.5255/UKDA-SN-5098-1> (Accessed on 5 November 2013).

16. National Centre for Social Research and University College London. Department of Epidemiology and Public Health, Health Survey for England, 2006 [computer file]. 4th Edition. Colchester, Essex: UK Data Archive [distributor], July 2011. SN: 5809 , <http://dx.doi.org/10.5255/UKDA-SN-5809-1> (Accessed on 5 November 2013).
17. National Centre for Social Research and University College London. Department of Epidemiology and Public Health, Health Survey for England, 2008 [computer file]. 4th Edition. Colchester, Essex: UK Data Archive [distributor], August 2013. SN: 6397 , <http://dx.doi.org/10.5255/UKDA-SN-6397-2> (Accessed on 5 November 2013).
18. NatCen Social Research and University College London. Department of Epidemiology and Public Health, Health Survey for England, 2011 [computer file]. Colchester, Essex: UK Data Archive [distributor], April 2013. SN: 7260 , <http://dx.doi.org/10.5255/UKDA-SN-7260-1> (Accessed on 5 November 2013).
19. UK DATA SERVICE. <http://ukdataservice.ac.uk/> (Accessed on 15 August 2013).
20. Bingham S, Cummings JH. The use of 4-aminobenzoic acid as a marker to validate the completeness of 24 h urine collections in man. *Clin Sci (Lond)* 1983;64:629-35.
21. National Statistics. Mortality statistics - cause. Review of the Registrar General on deaths by cause, sex and age, in England and Wales, 2003. Office for National Statistics, London. Series DH2 no. 30. Crown copyright 2004. Published with the permission of the Controller of Her Majesty's Stationery Office (HMSO).
22. National Statistics. Mortality statistics - Deaths registered in 2006. Review of the Registrar General on deaths by cause, sex and age, in England and Wales, 2006. Office for National Statistics. DR\_06. Crown copyright 2008. Published with the permission of the Controller of Her Majesty's Stationery Office (HMSO).
23. Office for National Statistics. Mortality statistics - Deaths registered in 2008. Review of the National Statistician on deaths in England and Wales, 2008. Series DR. Crown copyright 2009. Published with the permission of the Controller of Her Majesty's Stationery Office (HMSO).
24. Office for National Statistics. Deaths Registered in England and Wales (Series DR), 2011. <http://www.ons.gov.uk/ons/rel/vsob1/mortality-statistics--deaths-registered-in-england-and-wales--series-dr-/2010/stb-deaths-by-cause-2010.html> (Accessed 14 January 2014).
25. MacGregor GA, Markandu ND, Singer DR, et al. Moderate sodium restriction with angiotensin converting enzyme inhibitor in essential hypertension: a double blind study. *Br Med J (Clin Res Ed)* 1987;294:531-4.
26. Whelton PK, Appel LJ, Espeland MA, et al. Sodium reduction and weight loss in the treatment of hypertension in older persons: a randomized controlled trial of nonpharmacologic interventions in the elderly (TONE). TONE Collaborative Research Group. *JAMA* 1998;279:839-46.
27. Lewington S, Clarke R, Qizilbash N, et al. Age-specific relevance of usual blood pressure to vascular mortality: a meta-analysis of individual data for one million adults in 61 prospective studies. *Lancet* 2002;360:1903-193.
28. Wang Y, Rudd AG, Wolfe CD. Age and Ethnic Disparities in Incidence of Stroke Over Time: The South London Stroke Register. *Stroke* 2013.

- 1  
2  
3 29. Lee S, Shafe AC, Cowie MR. UK stroke incidence, mortality and cardiovascular risk  
4 management 1999-2008: time-trend analysis from the General Practice Research  
5 Database. *BMJ Open* 2011;1:e000269.  
6  
7 30. Law MR, Morris JK, Wald NJ. Use of blood pressure lowering drugs in the prevention of  
8 cardiovascular disease: meta-analysis of 147 randomised trials in the context of  
9 expectations from prospective epidemiological studies. *BMJ* 2009;338:b1665.  
10  
11 31. Strazzullo P, D'Elia L, Kandala NB, et al. Salt intake, stroke, and cardiovascular disease:  
12 meta-analysis of prospective studies. *BMJ* 2009;339:b4567.  
13  
14 32. National Institute for Health and Clinical Excellence (NICE). Guidance on the prevention  
15 of cardiovascular disease at the population level. <http://guidance.nice.org.uk/PH25>  
16 (Accessed 3 June 2013).  
17  
18 33. Sasaki N. The salt factor in apoplexy and hypertension: epidemiological studies in Japan.  
19 In: Yamori Y, ed. *Prophylactic Approach to Hypertensive Diseases*. New York: Raven  
20 Press, 1979:467-74.  
21  
22 34. Karppanen H, Mervaala E. Sodium intake and hypertension. *Prog Cardiovasc Dis*  
23 2006;49:59-75.  
24  
25 35. Laatikainen T, Pietinen P, Valsta L, et al. Sodium in the Finnish diet: 20-year trends in  
26 urinary sodium excretion among the adult population. *Eur J Clin Nutr* 2006;60:965-70.  
27  
28 36. Morgenstern H. Ecologic studies in epidemiology: concepts, principles, and methods.  
29 *Annu Rev Public Health* 1995;16:61-81.  
30  
31 37. Ji C, Kandala NB, Cappuccio FP. Spatial variation of salt intake in Britain and  
32 association with socioeconomic status. *BMJ Open* 2013;3:10.1136/bmjopen-2012-  
33 002246.  
34  
35  
36  
37  
38  
39  
40  
41  
42  
43  
44  
45  
46  
47  
48  
49  
50  
51  
52  
53  
54  
55  
56  
57  
58  
59  
60

Table 1. Changes in demographic parameters, blood pressure and other variables from 2003 to 2011

|                                                                  | 2003<br>(N=9183) | 2006<br>(N=8762) | 2008<br>(N=8974) | 2011<br>(N=4753) | P value |
|------------------------------------------------------------------|------------------|------------------|------------------|------------------|---------|
| <b>Age (year)</b>                                                | 49.5±0.2         | 50.6±0.2         | 50.4±0.2         | 51.0±0.3         | <0.001  |
| <b>Sex, N (%)</b>                                                |                  |                  |                  |                  |         |
| Men                                                              | 4108 (45)        | 3924 (45)        | 4040 (45)        | 2070 (44)        | 0.406   |
| Women                                                            | 5075 (55)        | 4838 (55)        | 4934 (55)        | 2683 (56)        |         |
| <b>Ethnic group, N (%)</b>                                       |                  |                  |                  |                  |         |
| White                                                            | 8559 (93)        | 8118 (93)        | 8241 (92)        | 4344 (92)        | <0.001  |
| Black                                                            | 148 (2)          | 158 (2)          | 170 (2)          | 95 (2)           |         |
| Mixed                                                            | 41 (0.4)         | 66 (1)           | 75 (1)           | 58 (1)           |         |
| Other                                                            | 429 (5)          | 418 (5)          | 483 (5)          | 251 (5)          |         |
| No qualification                                                 |                  |                  |                  |                  |         |
| <b>Highest education qualification, N (%)</b>                    |                  |                  |                  |                  |         |
| NVQ4/NVQ5/Degree equivalent                                      | 1527 (17)        | 1708 (20)        | 1803 (20)        | 1186 (25)        | <0.001  |
| Lower than higher education                                      | 1040 (11)        | 1078 (12)        | 1040 (12)        | 559 (12)         |         |
| NVQ3/GCE A level equivalent                                      | 1096 (12)        | 1124 (13)        | 1312 (15)        | 698 (15)         |         |
| NVQ2/GCE O level equivalent                                      | 2198 (24)        | 1944 (22)        | 1934(22)         | 1001 (21)        |         |
| NVQ1/GCE other equivalent                                        | 467 (5)          | 420 (5)          | 437 (5)          | 207 (4)          |         |
| Foreign or other                                                 | 431 (5)          | 175 (2)          | 173 (2)          | 71 (2)           |         |
| No qualification                                                 | 2416 (26)        | 2307 (26)        | 2273 (25)        | 1026 (22)        |         |
| <b>Household income in quintile (1 to 5, high to low), N (%)</b> |                  |                  |                  |                  |         |
| 1                                                                | 1355 (17)        | 1111 (15)        | 1213 (16)        | 608 (15)         | <0.001  |
| 2                                                                | 1421 (18)        | 1437 (20)        | 1501 (20)        | 813 (21)         |         |
| 3                                                                | 1760 (22)        | 1567 (22)        | 1548 (21)        | 816 (21)         |         |
| 4                                                                | 1821 (23)        | 1596 (22)        | 1595 (21)        | 867 (22)         |         |
| 5                                                                | 1653 (21)        | 1592 (22)        | 1665 (22)        | 850 (22)         |         |

**Frequency of alcohol consumption in past 12 months, N (%)**

|                                                    |            |            |            |            |        |
|----------------------------------------------------|------------|------------|------------|------------|--------|
| Every Day                                          | 1348 (15)  | 1208 (14)  | 1137 (13)  | 511 (11)   | <0.001 |
| 5/6 days/week                                      | 440 (5)    | 447 (5)    | 448 (5)    | 207 (4)    |        |
| 3/4 days/week                                      | 1443 (16)  | 1292 (15)  | 1395 (16)  | 667 (14)   |        |
| Once or twice a week                               | 2689 (29)  | 2392 (27)  | 2380 (27)  | 1252 (26)  |        |
| Once or twice a month                              | 1098 (12)  | 1100 (13)  | 1149 (13)  | 687 (15)   |        |
| Once every couple of months                        | 588 (6)    | 639 (7)    | 641 (7)    | 422 (9)    |        |
| Once or twice a year                               | 696 (8)    | 698 (8)    | 725 (8)    | 376 (8)    |        |
| Not at all                                         | 860 (9)    | 972 (11)   | 1075 (12)  | 619 (13)   |        |
| <b>Fruit and vegetable consumption (portion/d)</b> | 3.6±0.03   | 3.9±0.03   | 3.8±0.03   | 3.8±0.04   | <0.001 |
| <b>Body mass index (kg/m<sup>2</sup>)</b>          | 27.1±0.05  | 27.3±0.06  | 27.3±0.06  | 27.6±0.08  | <0.001 |
| <b>Blood pressure (mmHg)</b>                       |            |            |            |            |        |
| Systolic                                           | 129.3±0.20 | 128.3±0.19 | 127.4±0.19 | 126.3±0.25 | <0.001 |
| Diastolic                                          | 74.2±0.12  | 73.6±0.12  | 73.3±0.12  | 72.8±0.16  | <0.001 |
| <b>Total Cholesterol (mmol/L)</b>                  | 5.7±0.01   | 5.5±0.01   | 5.4±0.01   | 5.3±0.02   | <0.001 |
| <b>HDL (mmol/L)</b>                                | 1.53±0.005 | 1.50±0.005 | 1.50±0.005 | 1.51±0.008 | <0.001 |
| <b>Smoking Status, N (%)</b>                       |            |            |            |            |        |
| Never smoked cigarettes at all                     | 4258 (46)  | 4256 (49)  | 4473 (50)  | 2376 (50)  |        |
| Used to smoke cigarettes occasionally              | 595 (7)    | 477 (6)    | 483 (5)    | 279 (6)    |        |
| Used to smoke cigarettes regularly                 | 2565 (28)  | 2525 (29)  | 2536 (28)  | 1410 (30)  |        |
| Current cigarette smoker                           | 1749 (19)  | 1491 (17)  | 1458 (16)  | 680 (14)   | <0.001 |

1  
2  
3 **Salt reduction in England from 2003 to 2011 – Its relationship to blood pressure, stroke**  
4  
5 **and ischemic heart disease mortality**  
6  
7  
8

9 Feng J He, Sonia Pombo-Rodrigues, Graham A MacGregor

10  
11  
12  
13 Wolfson Institute of Preventive Medicine, Barts and The London School of Medicine & Dentistry,  
14  
15 Queen Mary University of London, UK  
16  
17  
18  
19  
20  
21  
22  
23  
24

25  
26 **Running title: Salt reduction, BP, stroke and IHD mortality**  
27  
28  
29  
30  
31  
32  
33  
34  
35  
36  
37

38 Correspondence to:

39 Dr. Feng He

40  
41 Wolfson Institute of Preventive Medicine,

42 Barts and The London School of Medicine & Dentistry,

43  
44 Queen Mary University of London,

45 Charterhouse Square,

46  
47 London EC1M 6BQ.

48  
49 Tel: 44 (0)20 7882 6266

50  
51 Fax: 44 (0)20 7882 6270

52  
53 E-mail: f.he@qmul.ac.uk  
54  
55  
56  
57  
58  
59  
60

## Abstract

**Objectives:** To determine the relationship between the reduction in salt intake that occurred in England, and blood pressure (BP), as well as mortality from stroke and ischemic heart disease (IHD).

**Design:** Analysis of the data from the Health Survey for England.

**Setting and participants:** England, 2003 N=9,183, 2006 N=8,762, 2008 N=8,974 and 2011 N=4,753, aged  $\geq 16$  years.

**Outcomes:** BP, stroke and IHD mortality.

**Results:** From 2003 to 2011, there was a decrease in mortality from stroke by 42% ( $P < 0.001$ ) and IHD by 40% ( $P < 0.001$ ). In parallel, there was a fall in BP of  $3.0 \pm 0.33 / 1.4 \pm 0.20$  mmHg ( $P < 0.001 / P < 0.001$ ), a decrease of  $0.4 \pm 0.02$  mmol/L ( $P < 0.001$ ) in cholesterol, a reduction in smoking from 19% to 14% ( $P < 0.001$ ), an increase in fruit and vegetable consumption ( $0.2 \pm 0.05$  portion/d,  $P < 0.001$ ), and an increase in body mass index (BMI) ( $0.5 \pm 0.09$  kg/m<sup>2</sup>,  $P < 0.001$ ). Salt intake as measured by 24-hour urinary sodium decreased by 1.4 g/d ( $P < 0.01$ ). It is likely that all of these factors (with the exception of BMI), along with improvements in the treatments of BP, cholesterol and CVD contributed to the falls in stroke and IHD mortality. In individuals who were not on anti-hypertensive medication, there was a fall in BP of  $2.7 \pm 0.34 / 1.1 \pm 0.23$  mmHg ( $P < 0.001 / P < 0.001$ ) after adjusting for age, sex, ethnic group, education, household income, alcohol consumption, fruit and vegetable intake, and BMI. Although salt intake was not measured in these participants, the fact that the average salt intake in a random sample of the UK population fell by 15% during the same period, suggests that the falls in BP would be largely attributable to the reduction in salt intake rather than anti-hypertensive medications.



1  
2  
3 **Conclusions:** The reduction in salt intake is likely to be an important contributor to the falls  
4  
5 in BP from 2003 to 2011 in England. As a result, it would have substantially contributed to  
6  
7 the decreases in stroke and IHD mortality.  
8  
9  
10  
11  
12  
13  
14  
15  
16  
17  
18  
19  
20  
21  
22  
23  
24  
25  
26  
27  
28  
29  
30  
31  
32  
33  
34  
35  
36  
37  
38  
39  
40  
41  
42  
43  
44  
45  
46  
47  
48  
49  
50  
51  
52  
53  
54  
55  
56  
57  
58  
59  
60

For peer review only

## ARTICLE SUMMARY

### Article focus

- A modest reduction in salt intake lowers blood pressure (BP) and, thereby, reduces cardiovascular risk.
- In the UK, salt intake as measured by 24-hour urinary sodium excretion decreased from 9.5 to 8.1 g/d from 2003 to 2011. During the same period, in England there was a fall of 3.0/1.4 mmHg in BP and a decrease of 42% and 40% in stroke and ischemic heart disease (IHD) mortality respectively.

### Key messages

- Our analysis of the data from the Health Survey for England showed that, in individuals who were not on any anti-hypertensive medications or other medications which might affect BP, there was a significant fall in BP of 2.7/1.1 mmHg from 2003 to 2011 after taking into account almost all major factors known to be associated with BP, including age, sex, ethnic group, education level, household income, alcohol consumption, fruit and vegetable intake and body mass index. Salt intake, a major determinant of population BP, was not included in this analysis because it was not measured in these participants. However, the fact that salt intake fell by 15% during the same period, would suggest that the falls in BP were largely attributable to the reduction in salt intake.
- As BP throughout its range is a major cause of stroke and IHD, the reduction in salt intake would have played an important role in the reduction in stroke and IHD mortality which occurred in England during this period.

### Strengths and limitations of this study

- The study used the best available data in England.
- Various surveys included different sets of participants. Therefore, the results of our study are potentially subject to ecological bias.

## Introduction

Cardiovascular disease (CVD) is the leading cause of death and disability worldwide.<sup>1</sup> Unhealthy diet and lifestyle factors are responsible for approximately 80% of CVD.<sup>2</sup> Among all of the risk factors for CVD, raised blood pressure (BP) is a major one, accounting for 62% of stroke and 49% of ischemic heart disease (IHD).<sup>3</sup> The recent analysis of global disease burden shows that raised BP is the leading risk factor, accounting for approximately 7% global disability adjusted life-years in 2010 and contributing to about 9.4 million deaths per year worldwide.<sup>4</sup>

In England, the average population BP has fallen in recent years<sup>5</sup> and CVD mortality has also declined.<sup>6</sup> These could be attributable to various factors such as changes in diet and lifestyle, as well as improvements in the treatments of BP, cholesterol and CVD.<sup>6</sup> An analysis of the data from the Health Survey for England showed that anti-hypertensive medications accounted for less than 25% of the systolic BP decline in men over the period of 1994-2002 and 2003-2009.<sup>7</sup> A population modelling study showed that reductions in major cardiovascular risk factors explained 43% of the recent fall in IHD mortality in England and the single largest contribution to the overall IHD mortality decrease came from falls in population BP with relatively small contributions from anti-hypertensive therapies.<sup>8</sup>

Evidence from various types of studies has consistently shown that a reduction in salt intake lowers BP and thereby reduces CVD risk.<sup>9-12</sup> A meta-analysis of relatively short-term salt reduction trials showed a dose-response relationship with a 1 g/d reduction in salt intake relating to approximately 1 mmHg fall in systolic BP.<sup>9</sup> The UK initiated a nationwide salt reduction programme in 2003/2004.<sup>13</sup> The programme has been successful and resulted in a 15% reduction in population salt intake by 2011.<sup>14</sup> To determine the relationship between this reduction in salt intake and the fall in BP and mortality from stroke and IHD, we

1  
2  
3 analysed the data from a series of health surveys carried out in a nationally representative  
4  
5 sample of the population in England.  
6  
7

## 8 **Methods**

### 9 **Data sources**

#### 10 ***Health Survey for England***

11  
12 We used the BP and other CVD risk factor data from the Health Survey for England,<sup>5 15-18</sup>  
13  
14 which is an annual survey of a random sample of the English population living in private  
15  
16 households. Data were obtained from the UK Data Service.<sup>19</sup> The methods used in the Health  
17  
18 Survey for England were reported in detail elsewhere<sup>5</sup> and only methods relevant to the  
19  
20 current analysis are described in brief here.  
21  
22  
23  
24

25  
26 We used the Health Survey for England data for 2003,<sup>15</sup> 2006,<sup>16</sup> 2008<sup>17</sup> and 2011<sup>18</sup>. We  
27  
28 included participants aged  $\geq 16$  years and who had BP measurements recorded (2003  
29  
30 N=9,183, 2006 N=8,762, 2008 N=8,974 and 2011 N=4,753). In all surveys, the interviewers  
31  
32 recorded demographic information, smoking status and consumption of alcohol, fruit and  
33  
34 vegetables. Trained nurses measured body weight, height and BP. Since 2003, BP has been  
35  
36 measured using Omron HEM207 using a standardised protocol in all surveys. BP was  
37  
38 measured in a seated position after the participant had five minutes' rest, using an  
39  
40 appropriately sized cuff on the right arm. Three BP readings were taken from each participant  
41  
42 at one minute intervals and the mean of the last two readings was used in the analysis.  
43  
44  
45  
46

#### 47 ***National Diet and Nutrition Survey***

48  
49 The mean salt intake as measured by 24-hour urinary sodium was taken from the National  
50  
51 Diet and Nutrition Survey (NDNS) in participants aged 19-64 years.<sup>14</sup> In the 2000/2001  
52  
53 survey, 24-hour urine was collected in a random sample of adults in Great Britain (N=1147).  
54  
55 In the 2005/2006 survey, 24-hour urine was collected in a random sample of adults in  
56  
57  
58  
59  
60

1  
2  
3 England (N=350) which was part of the Health Survey for England. In 2008, the 24-hour  
4  
5 urine collection was made in a random sample of adults in the UK (N=692) and, in 2011, 24-  
6  
7 hour urine was collected in a random sample of adults in England (N=547). In all surveys, the  
8  
9 completeness of the 24-hour urine collection was assessed using the para-aminobenzoic acid  
10  
11 (PABA) recovery method.<sup>14 20</sup>

### 12 13 14 **Office for National Statistics**

15  
16  
17 From the Office for National Statistics, we obtained the number of deaths from IHD (I20-  
18  
19 I25), cerebrovascular diseases (I60-I69) and mid-year population estimates aged  $\geq 15$  years  
20  
21 for England and Wales.<sup>21-24</sup> Deaths were certified by medical practitioners, using the Medical  
22  
23 Certificate of Cause of Death.<sup>21</sup>

### 24 25 26 **Statistical analysis**

27  
28  
29 Stroke and IHD mortality was calculated as the number of stroke or IHD deaths divided by  
30  
31 the population. Descriptive data on salt intake, BP and other continuous variables were  
32  
33 reported as mean $\pm$ SE. Comparisons among the four years (2003, 2006, 2008 and 2011) were  
34  
35 made by One-Way ANOVA for continuous variables and by  $\chi^2$  test for categorical variables.  
36  
37

38  
39 To estimate the contribution of salt intake to the changes of BP and to exclude any potential  
40  
41 confounding effect of treatments, we performed a separate analysis that included only  
42  
43 individuals who were not on any anti-hypertensive medications or other medications that  
44  
45 might affect BP. We compared BP in 2011 with that in 2003 using multiple regression  
46  
47 analysis, with adjustment for potential confounding factors. In the regression model, systolic  
48  
49 or diastolic BP was entered as the dependent variable and the independent variables included  
50  
51 year (1=2011 and 0=2003), age, sex (1=male and 0=female), ethnic group (1=white and  
52  
53 0=other), education level (1=A level or above and 0=other), household income (1=top 3  
54  
55  
56  
57  
58  
59  
60

1  
2  
3 quintiles and 0=bottom 2 quintiles), alcohol consumption (1=once or more a month and  
4  
5 0=less than once a month), fruit and vegetable intake, and body mass index (BMI).  
6  
7

8  
9 As 24-hour urinary sodium was not measured in the individuals who participated in the  
10 Health Survey for England, where BP and other CVD risk factors were recorded, we assumed  
11 that the changes in BP from 2003 to 2011, after adjusting for the above variables which  
12 included almost all other **major** factors known to be related to BP, were largely attributable to  
13 the changes in population salt intake which occurred during the same period.  
14  
15  
16  
17  
18  
19

20  
21 **We also performed a separate analysis that included only individuals aged 19-64 years**  
22 **examining the trend of BP and stroke and IHD mortality, as the age range was the same as**  
23 **those participants who had 24-hour urinary sodium measured.** All statistical analyses were  
24 carried out using Statistical Package for Social Science (SPSS).  
25  
26  
27  
28  
29

## 30 **Results**

### 31 **Stroke and IHD mortality**

32  
33  
34 In 2003, the mortality rates from stroke were 134/100,000 and the mortality rates from IHD  
35 were 232/100,000 for the adult population in England. As shown in Figure 1, there had been  
36 a gradual reduction in both stroke and IHD mortality. By 2011, stroke mortality decreased to  
37 78/100,000 (**P<0.001**) and IHD mortality decreased to 139/100,000 (**P<0.001**). Therefore,  
38 from 2003 to 2011, there was a reduction in mortality by 42% and 40% for stroke and IHD  
39 respectively.  
40  
41  
42  
43  
44  
45  
46  
47  
48  
49

### 50 **BP and other CVD risk factors**

51  
52 Table 1 showed the comparisons among the four years (2003, 2006, 2008 and 2011) in  
53 demographics and CVD risk factors. The mean age was slightly but significantly higher in  
54 2011 compared with that in 2003. Despite this, the mean BP fell from 129.3±0.20/74.2±0.12  
55  
56  
57  
58  
59  
60

1  
2  
3 mmHg in 2003 to  $126.3 \pm 0.25 / 72.8 \pm 0.16$  mmHg in 2011 (i.e. a fall of  $3.0 \pm 0.33 / 1.4 \pm 0.20$   
4 mmHg,  $P < 0.001$  for both systolic and diastolic BP). From 2003 to 2011, there was a decrease  
5 of  $0.4 \pm 0.02$  mmol/L ( $P < 0.001$ ) in total cholesterol, a reduction in smoking prevalence from  
6  
7 **19% to 14%** ( $P < 0.001$ ), and an increase in fruit and vegetable consumption of  $0.2 \pm 0.05$   
8  
9 portion/d ( $P < 0.001$ ). At the same time, there was a small but significant increase in body  
10  
11 mass index (BMI) by  $0.5 \pm 0.09$  kg/m<sup>2</sup> ( $P < 0.001$ ) and a small decrease in HDL (by  $0.02 \pm 0.01$   
12  
13 mmol/L,  $P < 0.05$ ).

14  
15  
16  
17  
18  
19  
20 The average salt intake, as measured by 24-hour urinary sodium excretion in a random  
21  
22 sample of the adult population, was  $9.5 \pm 0.2$  g/d in 2000/2001. Salt intake fell to  $9.0 \pm 0.4$  g/d  
23  
24 in 2005/2006,  $8.64 \pm 0.2$  g/d in 2008, and fell further to  $8.1 \pm 0.2$  g/d by 2011.<sup>14</sup> Therefore, from  
25  
26 2003 to 2011, salt intake decreased by 1.4 g/d (i.e. 15%,  $P < 0.05$  for the downward trend).<sup>14</sup>  
27  
28

29  
30 It is likely that **several** factors, i.e. the fall in BP, total cholesterol and smoking **prevalence**,  
31  
32 the reduction in salt intake and the increase in the consumption of fruit and vegetables, along  
33  
34 with improvements in the treatments of BP, cholesterol and CVD, contributed to the decrease  
35  
36 in stroke and IHD mortality.  
37  
38

### 39 **BP in untreated individuals**

40  
41 To investigate the role of salt reduction in the changes of BP, we compared the BP in 2011  
42  
43 with that in 2003 with adjustment for potential confounding factors. In order to further  
44  
45 exclude any potential confounding effect of BP treatments, we included only individuals who  
46  
47 were not on any **anti-hypertensive medications** or other **medications** that might affect BP.  
48  
49

50  
51 The results showed that there was a fall in BP of  $2.7 \pm 0.34 / 1.1 \pm 0.23$  mmHg ( $P < 0.001$  for both  
52  
53 systolic and diastolic BP) from 2003 to 2011 after adjusting for age, sex, ethnic group,  
54  
55 education level, household income, alcohol consumption, fruit and vegetable intake and BMI.  
56  
57  
58  
59  
60

1  
2  
3 These variables altogether explained 28% of the variance of systolic BP and 16% of the  
4  
5 variance of diastolic BP.  
6

7  
8 Salt intake was not included in the above regression model because it was not measured in  
9  
10 the same participants whose BP was recorded. However, the fact that after adjusting for  
11  
12 almost all other major factors known to be associated with BP, there was still a significant  
13  
14 fall in BP of 2.7/1.1 mmHg from 2003 to 2011, would suggest that these falls in BP were  
15  
16 likely to be largely attributable to the reduction in population salt intake which occurred  
17  
18 during this period.  
19  
20

### 21 22 **BP and stroke and IHD mortality in individuals aged 19-64 years**

23  
24 Our above conclusions were based on the assumption that the 15% reduction in salt intake  
25  
26 occurred in the whole adult population in England. However, 24-hour urinary sodium was  
27  
28 measured only in individuals aged 19-64 years. We have therefore performed separate  
29  
30 analyses on the trend of BP and stroke and IHD mortality in individuals of the same age  
31  
32 groups as those who had salt intake measured. The results showed that, from 2003 to 2011,  
33  
34 stroke mortality decreased from 128/1,000,000 to 82/1,000,000 (36% reduction,  $P < 0.001$ )  
35  
36 and IHD mortality decreased from 423/1,000,000 to 272/1,000,000 (36% reduction,  
37  
38  $P < 0.001$ ). In individuals who were not on any anti-hypertensive medications or other  
39  
40 medications that might affect BP, there was a fall in BP of  $1.9 \pm 0.34 / 1.0 \pm 0.25$  mmHg  
41  
42 ( $P < 0.001$  for both systolic and diastolic BP) from 2003 to 2011 after adjusting for age, sex,  
43  
44 ethnic group, education level, household income, alcohol consumption, fruit and vegetable  
45  
46 intake and BMI.  
47  
48  
49  
50

### 51 52 **Discussion**

53  
54 Our analyses showed that the average BP in the adult population in England decreased by  
55  
56 3.0/1.4 mmHg from 2003 to 2011. This could be attributable to various factors such as the  
57  
58  
59  
60



1  
2  
3 reduction in salt intake, the increase in fruit and vegetable consumption, and the improvement  
4  
5 in BP treatment and control. However, our findings that, in untreated individuals, there was a  
6  
7 fall in BP of 2.7/1.1 mmHg after taking into account age, sex, ethnic group, education level,  
8  
9 household income, alcohol consumption, fruit and vegetable intake and BMI, suggest that the  
10  
11 reduction in population salt intake which occurred from 2003 to 2011, is likely to be an  
12  
13 important contributor to the falls in BP. Although 24-hour urinary sodium was measured in  
14  
15 individuals aged 19-64 years, the reduction in salt intake is likely to have occurred across the  
16  
17 whole population as it was predominately achieved by a gradual reduction in the amount of  
18  
19 salt added to all processed foods, which accounts for approximately 80% of total salt intake.<sup>13</sup>  
20  
21

22  
23  
24 Our findings that the recent falls in BP occurred in England are largely attributable to the  
25  
26 reduction in salt intake rather than drug therapies, are consistent with the analysis by  
27  
28 DeWilde et al who showed that anti-hypertensive medications contributed to less than 25% of  
29  
30 the systolic BP decline in man.<sup>7</sup>  
31  
32

33 Although our analysis focused on individuals who were not on any BP medications, there is  
34  
35 clear evidence that, in individuals who are on antihypertensive drug treatments, a reduction in  
36  
37 salt intake is additive to drug therapies,<sup>25 26</sup> particularly drugs that block the renin-angiotensin  
38  
39 system.<sup>25</sup> Therefore, salt reduction would also have contributed to the falls in BP in those  
40  
41 who were on BP medications.  
42  
43

44  
45 The observed fall in systolic BP was larger than that might have been predicted from the  
46  
47 meta-analysis of randomised salt reduction trials.<sup>9</sup> This may be due to the difference in age  
48  
49 and duration of the studies. It has been shown that, for a given reduction in salt intake, the fall  
50  
51 in BP is larger in older people compared with younger individuals.<sup>9</sup> Indeed, our current  
52  
53 analysis showed that in individuals aged 19-64 years, the fall in BP from 2003 to 2011 was  
54  
55 smaller compared with that observed when all adults were included. Another important factor  
56  
57  
58  
59  
60

1  
2  
3 which may account for the observed larger fall in BP is the longer duration of the study, i.e.  
4  
5 over a period of 8 years. Most salt reduction trials had a duration of only a few weeks and the  
6  
7 median duration for the trials included in the meta-analysis was only 5 weeks in hypertensive  
8  
9 individuals and 4 weeks in normotensive individuals.<sup>9</sup> Whether salt reduction has exerted its  
10  
11 maximum effect by 4-5 weeks is not known, but much evidence would suggest that this is  
12  
13 unlikely. It is possible that a long-term reduction in population salt intake as reported in our  
14  
15 current analysis, could have a greater effect on BP than that observed in the salt reduction  
16  
17 trials with a duration of only a few weeks.  
18  
19

20  
21 It is well established that raised BP throughout its range is a major cause of CVD.<sup>27</sup> A  
22  
23 reduction in salt intake through its effect on BP would reduce CVD.<sup>9 11</sup> Additionally,  
24  
25 increasing evidence suggests that salt reduction may have a direct beneficial effect on  
26  
27 reducing CVD, independent of BP.<sup>10</sup> It is therefore, of interest, that we found a decrease in  
28  
29 both stroke and IHD mortality in parallel with the reduction in salt intake and the falls in BP  
30  
31 from 2003 to 2011 in England. Various other studies have documented a reduction in the  
32  
33 incidence of CVD. For example, a study using the South London Stroke Register showed that  
34  
35 the incidence of stroke decreased from 247/100,000 in 1995 to 149.5/100,000 in 2010 (i.e. a  
36  
37 reduction of 39.5% over 16 years),<sup>28</sup> and an analysis of the General Practice Research  
38  
39 Database showed that the incidence of stroke in the UK fell by 29% between 1999 and  
40  
41 2008.<sup>29</sup>  
42  
43  
44  
45

46 It is difficult to quantify the relative contribution of salt reduction to the decrease of CVD as  
47  
48 several other dietary and lifestyle factors as well as treatments all have played a part.  
49

50 However, based on the meta-analysis of BP treatment trials where a 10 mmHg reduction in  
51  
52 systolic BP was related to a decrease of 41% in stroke and 22% in IHD,<sup>30</sup> it was estimated  
53  
54 that a 2.7 mmHg reduction in systolic BP that occurred with salt reduction would be  
55  
56 predicted to reduce stroke by approximately 11% and IHD by 6%. Therefore, salt reduction is  
57  
58  
59  
60

1  
2  
3 likely to have played an important role in the decreases of stroke and IHD mortality in  
4  
5 England. These results are supported by the evidence from both prospective cohort studies  
6  
7 and outcome trials which have demonstrated that a reduction in salt intake is related to a  
8  
9 decrease in CVD risk.<sup>11 12 31</sup> A cost-effective analysis by National Institute for Health and  
10  
11 Clinical Excellence (NICE) shows that salt reduction not only saves lives, but also saves  
12  
13 money, and the reduction in salt intake achieved in the UK has saved more than £1.5 billion  
14  
15 per annum.<sup>32</sup>

16  
17  
18 Our findings that a reduction in population salt intake was related to a fall in population BP  
19  
20 and mortality from stroke and IHD in England are in agreement with those observed in Japan  
21  
22 and Finland.<sup>33 34</sup> Japan, in the late 1960s, carried out a government-led campaign to reduce  
23  
24 salt intake. Over the following decade, salt intake was reduced, particularly in northern areas  
25  
26 from 18 to 14 g/d. Paralleling this reduction in salt intake, there were falls in BP and an 80%  
27  
28 reduction in stroke mortality<sup>33</sup> in spite of large increases in fat intake, cigarette smoking,  
29  
30 alcohol consumption and obesity which occurred during that period. Finland, in the late  
31  
32 1970s, initiated a systematic approach to reducing salt intake through mass media-campaigns,  
33  
34 co-operation with the food industry and implementing salt labelling legislation.<sup>34 35</sup> This led  
35  
36 to a significant reduction in the average salt intake of the Finnish population<sup>34 35</sup> from ≈14 g/d  
37  
38 in 1972 to less than 9 g/d in 2002.<sup>34</sup> The reduction in salt intake was accompanied by a fall of  
39  
40 over 10 mmHg in both systolic and diastolic BP and a decrease of 75-80% in both stroke and  
41  
42 IHD mortality. Although these results were attributable to several factors, the reduction in  
43  
44 salt intake is likely to have played a major role, particularly in the fall in BP as BMI and  
45  
46 alcohol consumption increased during that time.

47  
48  
49  
50  
51  
52  
53 **Strengths and limitations:** The strength of our analysis is that we used the data from a  
54  
55 nationally representative sample of the population in England. However, there are several  
56  
57 potential limitations. First, our study used an ecological design that is subject to various  
58  
59

1  
2  
3 methodological issues.<sup>36</sup> Because we used data from national surveys that included different  
4  
5 sets of participants both cross-sectionally and longitudinally, we were unable to work with  
6  
7 data at the individual level, particularly as salt intake was not measured in the same  
8  
9 participants who had BP and other CVD risk factors recorded. Therefore, the results of our  
10  
11 study are potentially subject to ecological bias. Second, we could not exclude potential  
12  
13 confounding effect of some variables which were not measured, such as physical activity  
14  
15 levels which were recorded in 2003, but not in the 2011 survey. Third, the trend in 24-hour  
16  
17 urinary sodium was taken from the data either for England, Great Britain or the UK, as the  
18  
19 original report did not separate the results by countries. It has been shown that salt intake was  
20  
21 higher in Scotland and lower in Wales compared with that in England.<sup>14,37</sup> A difference in the  
22  
23 composition of the population surveyed at different years may cause a bias to the trend in 24-  
24  
25 hour urinary sodium. However, Scotland, Wales and Northern Ireland account for only a  
26  
27 small proportion of the UK population (altogether 16%). Additionally, the lower salt intake in  
28  
29 Wales and higher salt intake in Scotland might balance each other out to a certain degree in  
30  
31 the 2003 NDNS. Therefore, the 24-hour urinary sodium data for 2003 (Great Britain) and  
32  
33 2011 (England only) were likely to be comparable.

## 34 35 36 37 38 39 **Conclusions**

40  
41 The reduction in salt intake is likely to be an important contributor to the falls in BP in  
42  
43 England from 2003 to 2011. As a result, the decrease in salt intake would have played an  
44  
45 important role in the reduction in stroke and IHD mortality during this period. Despite  
46  
47 considerable progress being made on salt reduction, the mean salt intake in the UK  
48  
49 population (8.1 g/d in 2011) was still 35% higher than the recommended level of 6 g/d, and  
50  
51 70% of the adult population (80% men and 58% women) had a daily salt intake above the  
52  
53 recommended level.<sup>14</sup> Therefore, continuing and much greater efforts are needed to achieve  
54  
55 further reductions in salt intake to prevent the maximum number of stroke and IHD deaths.  
56  
57  
58  
59  
60

1  
2  
3  
4  
5  
6 **Acknowledgement:** We thank the original data creators, depositors, copyright holders, the  
7 funders of the Data Collections, and the UK Data Service for the use of data from the Health  
8 Survey for England. They bear no responsibility for the current analysis or interpretation of  
9 the results.  
10

11  
12  
13  
14  
15 **Contributors:** FJH and GAM designed the analysis plan. FJH performed statistical analyses  
16 and wrote the first draft of the manuscript. SPR contributed to database organisation and  
17 variable selections. All authors contributed to the interpretation of the results and revision of  
18 the manuscript. FJH is guarantor.  
19  
20  
21  
22

23  
24  
25 **Funding:** The study did not receive any funding.  
26

27  
28 **Competing interests:** All authors have completed the ICMJE uniform disclosure form at  
29 [www.icmje.org/coi\\_disclosure.pdf](http://www.icmje.org/coi_disclosure.pdf) (available on request from the corresponding author) and  
30 declare: no support from any organisation for the submitted work; no financial relationships  
31 with any organisations that might have an interest in the submitted work in the previous three  
32 years. FJH is a member of Consensus Action on Salt & Health (CASH) and World Action on  
33 Salt & Health (WASH). Both CASH and WASH are non-profit charitable organisations and  
34 FJH does not receive any financial support from CASH or WASH. GAM is Chairman of  
35 Blood Pressure UK (BPUK), Chairman of CASH and Chairman of WASH. BPUK, CASH  
36 and WASH are non-profit charitable organisations. GAM does not receive any financial  
37 support from any of these organisations. SPR is an employee of CASH.  
38  
39  
40  
41  
42  
43  
44  
45  
46  
47  
48  
49  
50  
51

52 **Ethics committee approval:** Our study is an analysis of previously collected data and  
53 therefore ethical approval was not required for our analysis. Ethical approval for the Health  
54 Survey for England was obtained by the survey team.  
55  
56  
57  
58  
59  
60

1  
2  
3  
4  
5 **Data sharing statement:** No additional data are available. The data are already in the public  
6  
7 domain.  
8  
9  
10  
11  
12  
13  
14  
15  
16  
17  
18  
19  
20  
21  
22  
23  
24  
25  
26  
27  
28  
29  
30  
31  
32  
33  
34  
35  
36  
37  
38  
39  
40  
41  
42  
43  
44  
45  
46  
47  
48  
49  
50  
51  
52  
53  
54  
55  
56  
57  
58  
59  
60

For peer review only

1  
2  
3 **Legend to Figure**  
4

5 **Figure 1.** Changes in salt intake as measured by 24-hour urinary sodium (UNa) excretion,  
6  
7 blood pressure (BP), stroke and ischemic heart disease (IHD) mortality in England from 2003  
8  
9 to 2011. \* P<0.05, \*\*\* P<0.001 for trend.  
10  
11  
12  
13  
14  
15  
16  
17  
18  
19  
20  
21  
22  
23  
24  
25  
26  
27  
28  
29  
30  
31  
32  
33  
34  
35  
36  
37  
38  
39  
40  
41  
42  
43  
44  
45  
46  
47  
48  
49  
50  
51  
52  
53  
54  
55  
56  
57  
58  
59  
60

For peer review only

## References

1. Lozano R, Naghavi M, Foreman K, Lim S, Shibuya K, Aboyans V, et al. Global and regional mortality from 235 causes of death for 20 age groups in 1990 and 2010: a systematic analysis for the Global Burden of Disease Study 2010. *Lancet* 2012;380:2095-128.
2. World Health Organization. Global status report on noncommunicable diseases. 2010. [http://whqlibdoc.who.int/publications/2011/9789240686458\\_eng.pdf](http://whqlibdoc.who.int/publications/2011/9789240686458_eng.pdf) (Accessed on 29 October 2013).
3. World Health Report 2002: Reducing risks, promoting healthy life. Geneva, Switzerland: World Health Organisation, 2002. [www.who.int/whr/2002](http://www.who.int/whr/2002) (Accessed 3 June 2013).
4. Lim SS, Vos T, Flaxman AD, Danaei G, Shibuya K, Adair-Rohani H, et al. A comparative risk assessment of burden of disease and injury attributable to 67 risk factors and risk factor clusters in 21 regions, 1990-2010: a systematic analysis for the Global Burden of Disease Study 2010. *Lancet* 2012;380:2224-60.
5. Health Survey for England. <http://www.hscic.gov.uk/catalogue/PUB09300> (Accessed on 16 January 2014).
6. O'Flaherty M, Buchan I, Capewell S. Contributions of treatment and lifestyle to declining CVD mortality: why have CVD mortality rates declined so much since the 1960s? *Heart* 2013;99:159-62.
7. DeWilde SJ, Carey IM, Shah SM, Harris T, Rudnicka AR, Whincup PH, et al. Trend in blood pressure in England: Good treatment or good luck? *J Epidemiol Community Health* 2012;66(Suppl 1):A41.
8. Bajekal M, Scholes S, Love H, Hawkins N, O'Flaherty M, Raine R, et al. Analysing recent socioeconomic trends in coronary heart disease mortality in England, 2000-2007: a population modelling study. *PLoS Med* 2012;9:e1001237.
9. He FJ, Li J, MacGregor GA. Effect of longer term modest salt reduction on blood pressure: Cochrane systematic review and meta-analysis of randomised trials. *BMJ* 2013;346:f1325.
10. He FJ, MacGregor GA. Reducing population salt intake worldwide: from evidence to implementation. *Prog Cardiovasc Dis* 2010;52:363-82.
11. Aburto NJ, Ziolkovska A, Hooper L, Elliott P, Cappuccino FP, Meerpohl JJ. Effect of lower sodium intake on health: systematic review and meta-analyses. *BMJ* 2013;346:f1326.
12. He FJ, MacGregor GA. Salt reduction lowers cardiovascular risk: meta-analysis of outcome trials. *Lancet* 2011;378:380-2.
13. He FJ, Brinsden HC, Macgregor GA. Salt reduction in the United Kingdom: a successful experiment in public health. *J Hum Hypertens* 2013:advance online publication, 31 October 2013; doi:10.1038/jhh.2013.105.
14. Department of Health: Assessment of Dietary Sodium Levels Among Adults (aged 19-64) in England, 2011. <http://transparency.dh.gov.uk/2012/06/21/sodium-levels-among-adults/> (Accessed 25 June 2012).
15. National Centre for Social Research and University College London. Department of Epidemiology and Public Health, Health Survey for England, 2003 [computer file]. 2nd



- 1  
2  
3 Edition. Colchester, Essex: UK Data Archive [distributor], April 2010. SN: 5098 ,  
4 <http://dx.doi.org/10.5255/UKDA-SN-5098-1> (Accessed on 5 November 2013).  
5  
6 16. National Centre for Social Research and University College London. Department of  
7 Epidemiology and Public Health, Health Survey for England, 2006 [computer file]. 4th  
8 Edition. Colchester, Essex: UK Data Archive [distributor], July 2011. SN: 5809 ,  
9 <http://dx.doi.org/10.5255/UKDA-SN-5809-1> (Accessed on 5 November 2013).  
10  
11 17. National Centre for Social Research and University College London. Department of  
12 Epidemiology and Public Health, Health Survey for England, 2008 [computer file]. 4th  
13 Edition. Colchester, Essex: UK Data Archive [distributor], August 2013. SN: 6397 ,  
14 <http://dx.doi.org/10.5255/UKDA-SN-6397-2> (Accessed on 5 November 2013).  
15  
16 18. NatCen Social Research and University College London. Department of Epidemiology  
17 and Public Health, Health Survey for England, 2011 [computer file]. Colchester, Essex:  
18 UK Data Archive [distributor], April 2013. SN: 7260 , [http://dx.doi.org/10.5255/UKDA-](http://dx.doi.org/10.5255/UKDA-SN-7260-1)  
19 [SN-7260-1](http://dx.doi.org/10.5255/UKDA-SN-7260-1) (Accessed on 5 November 2013).  
20  
21 19. UK DATA SERVICE. <http://ukdataservice.ac.uk/> (Accessed on 15 August 2013).  
22  
23 20. Bingham S, Cummings JH. The use of 4-aminobenzoic acid as a marker to validate the  
24 completeness of 24 h urine collections in man. *Clin Sci (Lond)* 1983;64:629-35.  
25  
26 21. National Statistics. Mortality statistics - cause. Review of the Registrar General on deaths  
27 by cause, sex and age, in England and Wales, 2003. Office for National Statistics,  
28 London. Series DH2 no. 30. Crown copyright 2004. Published with the permission of the  
29 Controller of Her Majesty's Stationery Office (HMSO).  
30  
31 22. National Statistics. Mortality statistics - Deaths registered in 2006. Review of the  
32 Registrar General on deaths by cause, sex and age, in England and Wales, 2006. Office  
33 for National Statistics. DR\_06. Crown copyright 2008. Published with the permission of  
34 the Controller of Her Majesty's Stationery Office (HMSO).  
35  
36 23. Office for National Statistics. Mortality statistics - Deaths registered in 2008. Review of  
37 the National Statistician on deaths in England and Wales, 2008. Series DR. Crown  
38 copyright 2009. Published with the permission of the Controller of Her Majesty's  
39 Stationery Office (HMSO).  
40  
41 24. Office for National Statistics. Deaths Registered in England and Wales (Series DR),  
42 2011. [http://www.ons.gov.uk/ons/rel/vsob1/mortality-statistics--deaths-registered-in-](http://www.ons.gov.uk/ons/rel/vsob1/mortality-statistics--deaths-registered-in-england-and-wales--series-dr-/2010/stb-deaths-by-cause-2010.html)  
43 [england-and-wales--series-dr-/2010/stb-deaths-by-cause-2010.html](http://www.ons.gov.uk/ons/rel/vsob1/mortality-statistics--deaths-registered-in-england-and-wales--series-dr-/2010/stb-deaths-by-cause-2010.html) (Accessed 14 January  
44 2014).  
45  
46 25. MacGregor GA, Markandu ND, Singer DR, Cappuccio FP, Shore AC, Sagnella GA.  
47 Moderate sodium restriction with angiotensin converting enzyme inhibitor in essential  
48 hypertension: a double blind study. *Br Med J (Clin Res Ed)* 1987;294:531-4.  
49  
50 26. Whelton PK, Appel LJ, Espeland MA, Applegate WB, Ettinger WH, Jr., Kostis JB, et al.  
51 Sodium reduction and weight loss in the treatment of hypertension in older persons: a  
52 randomized controlled trial of nonpharmacologic interventions in the elderly (TONE).  
53 TONE Collaborative Research Group. *JAMA* 1998;279:839-46.  
54  
55 27. Lewington S, Clarke R, Qizilbash N, Peto R, Collins R. Age-specific relevance of usual  
56 blood pressure to vascular mortality: a meta-analysis of individual data for one million  
57 adults in 61 prospective studies. *Lancet* 2002;360:1903-193.  
58  
59  
60

- 1  
2  
3 28. Wang Y, Rudd AG, Wolfe CD. Age and Ethnic Disparities in Incidence of Stroke Over  
4 Time: The South London Stroke Register. *Stroke* 2013.  
5  
6 29. Lee S, Shafe AC, Cowie MR. UK stroke incidence, mortality and cardiovascular risk  
7 management 1999-2008: time-trend analysis from the General Practice Research  
8 Database. *BMJ Open* 2011;1:e000269.  
9  
10 30. Law MR, Morris JK, Wald NJ. Use of blood pressure lowering drugs in the prevention of  
11 cardiovascular disease: meta-analysis of 147 randomised trials in the context of  
12 expectations from prospective epidemiological studies. *BMJ* 2009;338:b1665.  
13  
14 31. Strazzullo P, D'Elia L, Kandala NB, Cappuccio FP. Salt intake, stroke, and cardiovascular  
15 disease: meta-analysis of prospective studies. *BMJ* 2009;339:b4567.  
16  
17 32. National Institute for Health and Clinical Excellence (NICE). Guidance on the prevention  
18 of cardiovascular disease at the population level. <http://guidance.nice.org.uk/PH25>  
19 (Accessed 3 June 2013).  
20  
21 33. Sasaki N. The salt factor in apoplexy and hypertension: epidemiological studies in Japan.  
22 In: Yamori Y, ed. Prophylactic Approach to Hypertensive Diseases. New York: Raven  
23 Press, 1979:467-74.  
24  
25 34. Karppanen H, Mervaala E. Sodium intake and hypertension. *Prog Cardiovasc Dis*  
26 2006;49:59-75.  
27  
28 35. Laatikainen T, Pietinen P, Valsta L, Sundvall J, Reinivuo H, Tuomilehto J. Sodium in the  
29 Finnish diet: 20-year trends in urinary sodium excretion among the adult population. *Eur*  
30 *J Clin Nutr* 2006;60:965-70.  
31  
32 36. Morgenstern H. Ecologic studies in epidemiology: concepts, principles, and methods.  
33 *Annu Rev Public Health* 1995;16:61-81.  
34  
35 37. Ji C, Kandala NB, Cappuccio FP. Spatial variation of salt intake in Britain and  
36 association with socioeconomic status. *BMJ Open* 2013;3:10.1136/bmjopen-2012-  
37 002246.  
38  
39  
40  
41  
42  
43  
44  
45  
46  
47  
48  
49  
50  
51  
52  
53  
54  
55  
56  
57  
58  
59  
60

Table 1. Changes in demographic parameters, blood pressure and other variables from 2003 to 2011

|                                                                  | 2003<br>(N=9183) | 2006<br>(N=8762) | 2008<br>(N=8974) | 2011<br>(N=4753) | P value |
|------------------------------------------------------------------|------------------|------------------|------------------|------------------|---------|
| <b>Age (year)</b>                                                | 49.5±0.2         | 50.6±0.2         | 50.4±0.2         | 51.0±0.3         | <0.001  |
| <b>Sex, N (%)</b>                                                |                  |                  |                  |                  |         |
| Men                                                              | 4108 (45)        | 3924 (45)        | 4040 (45)        | 2070 (44)        |         |
| Women                                                            | 5075 (55)        | 4838 (55)        | 4934 (55)        | 2683 (56)        | 0.406   |
| <b>Ethnic group, N (%)</b>                                       |                  |                  |                  |                  |         |
| White                                                            | 8559 (93)        | 8118 (93)        | 8241 (92)        | 4344 (92)        |         |
| Black                                                            | 148 (2)          | 158 (2)          | 170 (2)          | 95 (2)           |         |
| Mixed                                                            | 41 (0.4)         | 66 (1)           | 75 (1)           | 58 (1)           |         |
| Other                                                            | 429 (5)          | 418 (5)          | 483 (5)          | 251 (5)          | <0.001  |
| <b>Highest education qualification, N (%)</b>                    |                  |                  |                  |                  |         |
| NVQ4/NVQ5/Degree equivalent                                      | 1527 (17)        | 1708 (20)        | 1803 (20)        | 1186 (25)        |         |
| Lower than higher education                                      | 1040 (11)        | 1078 (12)        | 1040 (12)        | 559 (12)         |         |
| NVQ3/GCE A level equivalent                                      | 1096 (12)        | 1124 (13)        | 1312 (15)        | 698 (15)         |         |
| NVQ2/GCE O level equivalent                                      | 2198 (24)        | 1944 (22)        | 1934 (22)        | 1001 (21)        |         |
| NVQ1/GCE other equivalent                                        | 467 (5)          | 420 (5)          | 437 (5)          | 207 (4)          |         |
| Foreign or other                                                 | 431 (5)          | 175 (2)          | 173 (2)          | 71 (2)           |         |
| No qualification                                                 | 2416 (26)        | 2307 (26)        | 2273 (25)        | 1026 (22)        | <0.001  |
| <b>Household income in quintile (1 to 5, high to low), N (%)</b> |                  |                  |                  |                  |         |
| 1                                                                | 1355 (17)        | 1111 (15)        | 1213 (16)        | 608 (15)         |         |
| 2                                                                | 1421 (18)        | 1437 (20)        | 1501 (20)        | 813 (21)         |         |
| 3                                                                | 1760 (22)        | 1567 (22)        | 1548 (21)        | 816 (21)         |         |
| 4                                                                | 1821 (23)        | 1596 (22)        | 1595 (21)        | 867 (22)         |         |
| 5                                                                | 1653 (21)        | 1592 (22)        | 1665 (22)        | 850 (22)         | <0.001  |

**Frequency of alcohol consumption in past 12 months, N (%)**

|                                                    |                  |                  |                  |                  |        |
|----------------------------------------------------|------------------|------------------|------------------|------------------|--------|
| Every Day                                          | 1348 (15)        | 1208 (14)        | 1137 (13)        | 511 (11)         | <0.001 |
| 5/6 days/week                                      | 440 (5)          | 447 (5)          | 448 (5)          | 207 (4)          |        |
| 3/4 days/week                                      | 1443 (16)        | 1292 (15)        | 1395 (16)        | 667 (14)         |        |
| Once or twice a week                               | 2689 (29)        | 2392 (27)        | 2380 (27)        | 1252 (26)        |        |
| Once or twice a month                              | 1098 (12)        | 1100 (13)        | 1149 (13)        | 687 (15)         |        |
| Once every couple of months                        | 588 (6)          | 639 (7)          | 641 (7)          | 422 (9)          |        |
| Once or twice a year                               | 696 (8)          | 698 (8)          | 725 (8)          | 376 (8)          |        |
| Not at all                                         | 860 (9)          | 972 (11)         | 1075 (12)        | 619 (13)         |        |
| <b>Fruit and vegetable consumption (portion/d)</b> | <b>3.6±0.03</b>  | <b>3.9±0.03</b>  | <b>3.8±0.03</b>  | <b>3.8±0.04</b>  | <0.001 |
| <b>Body mass index (kg/m<sup>2</sup>)</b>          | <b>27.1±0.05</b> | <b>27.3±0.06</b> | <b>27.3±0.06</b> | <b>27.6±0.08</b> | <0.001 |
| <b>Blood pressure (mmHg)</b>                       |                  |                  |                  |                  |        |
| Systolic                                           | 129.3±0.20       | 128.3±0.19       | 127.4±0.19       | 126.3±0.25       | <0.001 |
| Diastolic                                          | 74.2±0.12        | 73.6±0.12        | 73.3±0.12        | 72.8±0.16        | <0.001 |
| <b>Total Cholesterol (mmol/L)</b>                  | 5.7±0.01         | 5.5±0.01         | 5.4±0.01         | 5.3±0.02         | <0.001 |
| <b>HDL (mmol/L)</b>                                | 1.53±0.005       | 1.50±0.005       | 1.50±0.005       | 1.51±0.008       | <0.001 |
| <b>Smoking Status, N (%)</b>                       |                  |                  |                  |                  |        |
| Never smoked cigarettes at all                     | 4258 (46)        | 4256 (49)        | 4473 (50)        | 2376 (50)        |        |
| Used to smoke cigarettes occasionally              | 595 (7)          | 477 (6)          | 483 (5)          | 279 (6)          |        |
| Used to smoke cigarettes regularly                 | 2565 (28)        | 2525 (29)        | 2536 (28)        | 1410 (30)        |        |
| Current cigarette smoker                           | 1749 (19)        | 1491 (17)        | 1458 (16)        | 680 (14)         | <0.001 |

1  
2  
3  
4  
5  
6  
7  
8  
9  
10  
11  
12  
13  
14  
15  
16  
17  
18  
19  
20  
21  
22  
23  
24  
25  
26  
27  
28  
29  
30  
31  
32  
33  
34  
35  
36  
37  
38  
39  
40  
41  
42  
43  
44  
45  
46  
47  
48  
49  
50  
51  
52  
53  
54  
55  
56  
57  
58  
59  
60

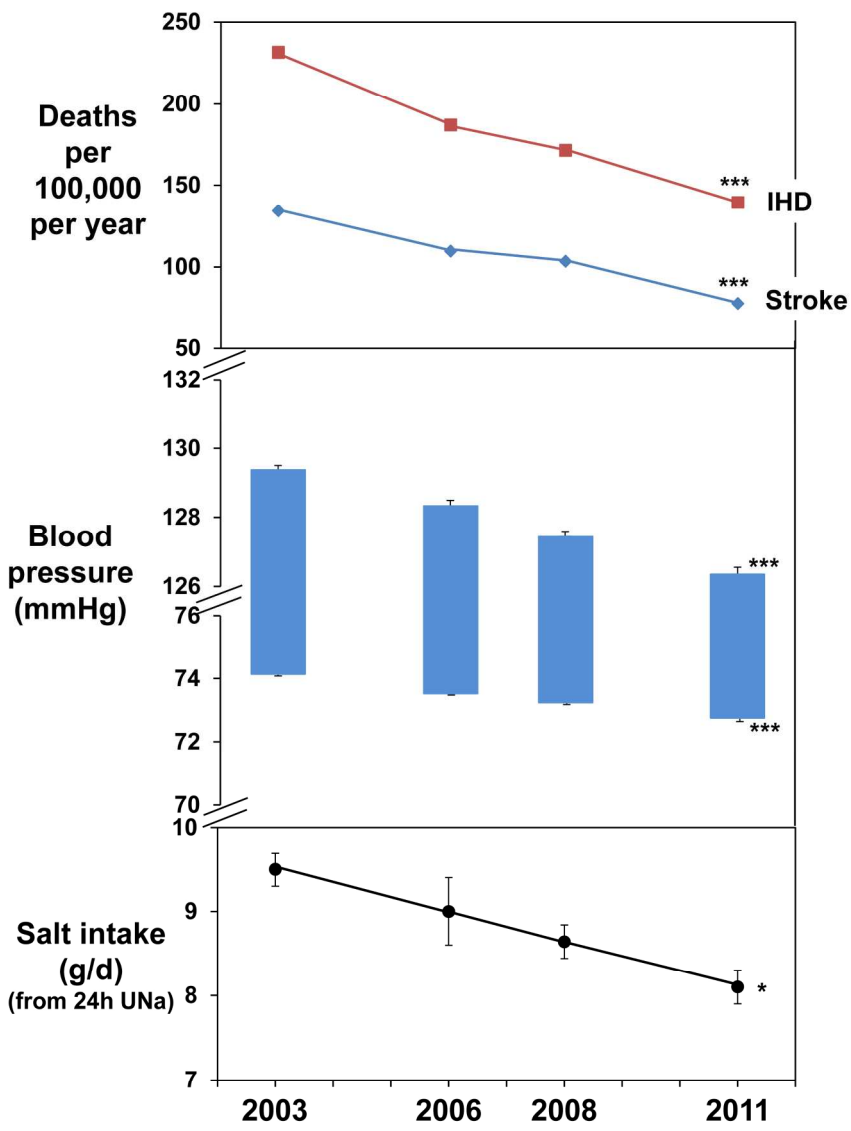

Figure 1  
231x308mm (300 x 300 DPI)

## STROBE Statement—checklist of items that should be included in reports of observational studies

|                           | Item No | Recommendation                                                                                                                                                                                                                                                                                                                                                                                                                                                         | Page Number Reported |
|---------------------------|---------|------------------------------------------------------------------------------------------------------------------------------------------------------------------------------------------------------------------------------------------------------------------------------------------------------------------------------------------------------------------------------------------------------------------------------------------------------------------------|----------------------|
| <b>Title and abstract</b> | 1       | (a) Indicate the study's design with a commonly used term in the title or the abstract                                                                                                                                                                                                                                                                                                                                                                                 | 2-3                  |
|                           |         | (b) Provide in the abstract an informative and balanced summary of what was done and what was found                                                                                                                                                                                                                                                                                                                                                                    | 2-3                  |
| <b>Introduction</b>       |         |                                                                                                                                                                                                                                                                                                                                                                                                                                                                        |                      |
| Background/rationale      | 2       | Explain the scientific background and rationale for the investigation being reported                                                                                                                                                                                                                                                                                                                                                                                   | 5                    |
| Objectives                | 3       | State specific objectives, including any prespecified hypotheses                                                                                                                                                                                                                                                                                                                                                                                                       | 5-6                  |
| <b>Methods</b>            |         |                                                                                                                                                                                                                                                                                                                                                                                                                                                                        |                      |
| Study design              | 4       | Present key elements of study design early in the paper                                                                                                                                                                                                                                                                                                                                                                                                                | 5                    |
| Setting                   | 5       | Describe the setting, locations, and relevant dates, including periods of recruitment, exposure, follow-up, and data collection                                                                                                                                                                                                                                                                                                                                        | 5-6                  |
| Participants              | 6       | (a) <i>Cohort study</i> —Give the eligibility criteria, and the sources and methods of selection of participants. Describe methods of follow-up<br><i>Case-control study</i> —Give the eligibility criteria, and the sources and methods of case ascertainment and control selection. Give the rationale for the choice of cases and controls<br><i>Cross-sectional study</i> —Give the eligibility criteria, and the sources and methods of selection of participants | Not applicable       |
|                           |         | (b) <i>Cohort study</i> —For matched studies, give matching criteria and number of exposed and unexposed<br><i>Case-control study</i> —For matched studies, give matching criteria and the number of controls per case                                                                                                                                                                                                                                                 | Not applicable       |
| Variables                 | 7       | Clearly define all outcomes, exposures, predictors, potential confounders, and effect modifiers. Give diagnostic criteria, if applicable                                                                                                                                                                                                                                                                                                                               | 6-7                  |
| Data sources/measurement  | 8*      | For each variable of interest, give sources of data and details of methods of assessment (measurement). Describe comparability of assessment methods if there is more than one group                                                                                                                                                                                                                                                                                   | 6-7                  |
| Bias                      | 9       | Describe any efforts to address potential sources of bias                                                                                                                                                                                                                                                                                                                                                                                                              | 7-8                  |
| Study size                | 10      | Explain how the study size was arrived at                                                                                                                                                                                                                                                                                                                                                                                                                              | Not applicable       |
| Quantitative variables    | 11      | Explain how quantitative variables were handled in the analyses. If applicable, describe which groupings were chosen and why                                                                                                                                                                                                                                                                                                                                           | 7-8                  |
| Statistical methods       | 12      | (a) Describe all statistical methods, including those used to control for confounding                                                                                                                                                                                                                                                                                                                                                                                  | 7-8                  |
|                           |         | (b) Describe any methods used to examine subgroups and interactions                                                                                                                                                                                                                                                                                                                                                                                                    | 7-8                  |
|                           |         | (c) Explain how missing data were addressed                                                                                                                                                                                                                                                                                                                                                                                                                            | Not applicable       |
|                           |         | (d) <i>Cohort study</i> —If applicable, explain how loss to follow-up was addressed<br><i>Case-control study</i> —If applicable, explain how matching of cases and controls was addressed                                                                                                                                                                                                                                                                              | Not applicable       |

|                          |     |                                                                                                                                                                                                              |                |
|--------------------------|-----|--------------------------------------------------------------------------------------------------------------------------------------------------------------------------------------------------------------|----------------|
|                          |     | <i>Cross-sectional study</i> —If applicable, describe analytical methods taking account of sampling strategy                                                                                                 |                |
|                          |     | (e) Describe any sensitivity analyses                                                                                                                                                                        | Not applicable |
| <b>Results</b>           |     |                                                                                                                                                                                                              |                |
| Participants             | 13* | (a) Report numbers of individuals at each stage of study—eg numbers potentially eligible, examined for eligibility, confirmed eligible, included in the study, completing follow-up, and analysed            | Not applicable |
|                          |     | (b) Give reasons for non-participation at each stage                                                                                                                                                         | Not applicable |
|                          |     | (c) Consider use of a flow diagram                                                                                                                                                                           | Not applicable |
| Descriptive data         | 14* | (a) Give characteristics of study participants (eg demographic, clinical, social) and information on exposures and potential confounders                                                                     | Table 1, 21    |
|                          |     | (b) Indicate number of participants with missing data for each variable of interest                                                                                                                          | Table 1        |
|                          |     | (c) <i>Cohort study</i> —Summarise follow-up time (eg, average and total amount)                                                                                                                             | Not applicable |
| Outcome data             | 15* | <i>Cohort study</i> —Report numbers of outcome events or summary measures over time                                                                                                                          | Not applicable |
|                          |     | <i>Case-control study</i> —Report numbers in each exposure category, or summary measures of exposure                                                                                                         | Not applicable |
|                          |     | <i>Cross-sectional study</i> —Report numbers of outcome events or summary measures                                                                                                                           | 8-10           |
| Main results             | 16  | (a) Give unadjusted estimates and, if applicable, confounder-adjusted estimates and their precision (eg, 95% confidence interval). Make clear which confounders were adjusted for and why they were included | 8-10           |
|                          |     | (b) Report category boundaries when continuous variables were categorized                                                                                                                                    | Not applicable |
|                          |     | (c) If relevant, consider translating estimates of relative risk into absolute risk for a meaningful time period                                                                                             | Not applicable |
| Other analyses           | 17  | Report other analyses done—eg analyses of subgroups and interactions, and sensitivity analyses                                                                                                               | 9-10           |
| <b>Discussion</b>        |     |                                                                                                                                                                                                              |                |
| Key results              | 18  | Summarise key results with reference to study objectives                                                                                                                                                     | 10-11          |
| Limitations              | 19  | Discuss limitations of the study, taking into account sources of potential bias or imprecision. Discuss both direction and magnitude of any potential bias                                                   | 13-14          |
| Interpretation           | 20  | Give a cautious overall interpretation of results considering objectives, limitations, multiplicity of analyses, results from similar studies, and other relevant evidence                                   | 14             |
| Generalisability         | 21  | Discuss the generalisability (external validity) of the study results                                                                                                                                        | 10-11,14       |
| <b>Other information</b> |     |                                                                                                                                                                                                              |                |
| Funding                  | 22  | Give the source of funding and the role of the funders for the present study and, if applicable, for the original study on which the present article is based                                                | 15             |

\*Give information separately for cases and controls in case-control studies and, if applicable, for exposed and unexposed groups in cohort and cross-sectional studies.

1  
2  
3 **Note:** An Explanation and Elaboration article discusses each checklist item and gives methodological background and  
4 published examples of transparent reporting. The STROBE checklist is best used in conjunction with this article (freely  
5 available on the Web sites of PLoS Medicine at <http://www.plosmedicine.org/>, Annals of Internal Medicine at  
6 <http://www.annals.org/>, and Epidemiology at <http://www.epidem.com/>). Information on the STROBE Initiative is  
7 available at [www.strobe-statement.org](http://www.strobe-statement.org).  
8  
9  
10  
11  
12  
13  
14  
15  
16  
17  
18  
19  
20  
21  
22  
23  
24  
25  
26  
27  
28  
29  
30  
31  
32  
33  
34  
35  
36  
37  
38  
39  
40  
41  
42  
43  
44  
45  
46  
47  
48  
49  
50  
51  
52  
53  
54  
55  
56  
57  
58  
59  
60

For peer review only
